# Supplementary material for: The effect of cost-sharing design characteristics on use of health care recommended by the treating physician; a discrete choice experiment
Source: BMC Health Serv Res. 2018 Oct 20;18:797. doi: 10.1186/s12913-018-3598-4 (PMC6195970; doi:10.1186/s12913-018-3598-4)
Supplement: Supplementary file 3 — Complete output of additional analyses. This file contains the complete output of the additional analyses (attributes are interacted with respondents’ characteristics). Each worksheet contains results from one characteristic. In each worksheet, the interactions terms are shown for easy assessment across each type of health service while the complete output is provided below. (XLSX 218 kb) [file 12913_2018_3598_MOESM3_ESM.xlsx]

## Sheet: subjectivehealth
SUBJECTIVE HEALTH
Interaction terms:
	Type of health service:		Prescribed medication							Type of health service:		Diagnostic tests							Type of health service:		Specialist care
	Group:		Forgoing healthcare			Utilizing healthcare				Group:		Forgoing healthcare			Utilizing healthcare				Group:		Forgoing healthcare			Utilizing healthcare
			Coef.	SE	P-value	Coef.	SE	P-value				Coef.	SE	P-value	Coef.	SE	P-value				Coef.	SE	P-value	Coef.	SE	P-value
	(only subset of estimated variables are shown)									(only subset of estimated variables are shown)									(only subset of estimated variables are shown)
	Interaction terms:									Interaction terms:									Interaction terms:
		type1*moderatehealth	0.834125	0.332482	0.0121331	0.548627	0.211854	0.00960859			type1*moderatehealth	0.833994	0.539979	0.122492	0.52415	0.252598	0.0379861			type1*moderatehealth	0.287008	0.578154	0.619606	0.180977	0.282264	0.521419
		type1*goodhealth	0.410335	0.389876	0.292611	1.35551	0.217748	4.82739e-10			type1*goodhealth	1.51507	0.579734	0.00897492	1.69604	0.256907	4.08254e-11			type1*goodhealth	1.23256	0.612255	0.0441206	1.17252	0.292467	6.10141e-05
		rate1*moderatehealth	0.173568	0.27698	0.530909	0.578159	0.150147	0.000117879			rate1*moderatehealth	1.242	0.452637	0.00607902	0.334724	0.153379	0.0290869			rate1*moderatehealth	0.862428	0.444362	0.0523035	0.1696	0.154554	0.272492
		rate1*goodhealth	0.674023	0.320308	0.0353815	0.831677	0.155409	8.73819e-08			rate1*goodhealth	1.82375	0.480092	0.000146079	0.892485	0.158745	1.89126e-08			rate1*goodhealth	2.03487	0.464605	1.19814e-05	0.586756	0.162049	0.000293811
		rate2*moderatehealth	0.298362	0.250603	0.233854	0.680542	0.133113	3.184e-07			rate2*moderatehealth	1.1787	0.44043	0.0074542	0.494994	0.144423	0.000609659			rate2*moderatehealth	0.618907	0.396699	0.118753	0.318601	0.133948	0.0173832
		rate2*goodhealth	0.506591	0.28742	0.0780123	0.828653	0.136912	1.43122e-09			rate2*goodhealth	1.7625	0.466905	0.000160797	0.923782	0.148614	5.12011e-10			rate2*goodhealth	1.1962	0.408223	0.00339312	0.582479	0.139524	2.98608e-05
		cap1*moderatehealth	0.097301	0.210416	0.643791	0.128239	0.111866	0.251648			cap1*moderatehealth	0.237308	0.319992	0.458339	0.085932	0.109941	0.43444			cap1*moderatehealth	0.399727	0.329156	0.22462	-0.06539	0.109804	0.551502
		cap1*goodhealth	-0.01842	0.24246	0.939444	0.296853	0.121631	0.0146639			cap1*goodhealth	0.318452	0.332396	0.338055	0.271522	0.117754	0.0211216			cap1*goodhealth	0.735877	0.337237	0.0291235	0.019548	0.117397	0.867754
		moment1*moderatehealth	-0.13327	0.206516	0.518734	0.456317	0.23251	0.0496989			moment1*moderatehealth	0.626372	0.460993	0.174251	0.699522	0.277798	0.0118008			moment1*moderatehealth	0.70241	0.477102	0.140981	1.41685	0.305482	3.52147e-06
		moment1*goodhealth	0.247297	0.232725	0.287987	0.110317	0.238183	0.64325			moment1*goodhealth	0.131209	0.487684	0.787899	-0.0163	0.279939	0.953568			moment1*goodhealth	0.419059	0.505447	0.407073	0.979167	0.316315	0.00196514
	Model:									Model:									Model:
	Number of individuals		475			6277				Number of individuals		738			5510				Number of individuals		662			4702
	Number of observations		8550			112986				Number of observations		13284			99180				Number of observations		11916			84636
	Log-likelihood		-2059.01			-22472.1				Log-likelihood		-3106.02			-20204.7				Log-likelihood		-2101.47			-17377.3
	Labels: type1 (copayments), type2 (coinsurances), rate1 (€2/40%), rate2 (€4/50%), rate3 (€7/70%), cap1 (half cap), cap2 (full cap). The level of subjective health is enclosed in variable label (e.g. moderatehealth indicates a self-reported moderate health) and is compared to reference dummy (poor health). Respondents' characteristics are dummy coded. Hence, the utility derived from the reference …									Labels: type1 (copayments), type2 (coinsurances), rate1 (€40/15%), rate2 (€50/20%), rate3 (€80/30%), cap1 (half cap), cap2 (full cap). The level of subjective health is enclosed in variable label (e.g. moderatehealth indicates a self-reported moderate health) and is compared to reference dummy (poor health). Respondents' characteristics are dummy coded. Hence, the utility derived from the referen…									Labels: type1 (copayments), type2 (coinsurances), rate1 (€100/5%), rate2 (€140/7%), rate3 (€200/10%), cap1 (half cap), cap2 (full cap). The level of subjective health is enclosed in variable label (e.g. moderatehealth indicates a self-reported moderate health) and is compared to reference dummy (poor health). Respondents' characteristics are dummy coded. Hence, the utility derived from the refere…
Equation2:
	Vij=β1*Type1 + β2*Rate1 + β3*Rate2 + β4*Cap1 + β5*Cap1*Type1 + β6*Cap1*Rate1 + β7*Cap1*Rate2 + β8*Cap1*Moment1 + β9*Moment1 + β10*AlternativeSpecificConstant(optout) + β11*Type1*Moderatehealth + β12*Type1*Goodhealth + β13*Rate1*Moderatehealth + β14*Rate1*Goodhealth + β15*Rate2*Moderatehealth + β16*Rate2*Goodhealth + β17*Cap1*Moderatehealth + β18*Cap1*Goodhealth + β19*Moment1*Moderatehealth + β20*…
Full output
Type:	Prescribed medication								Type:	Prescribed medication
Group:	Forgoing healthcare								Group:	Utilizing healthcare
Output									Output
	Mixed logit model									Mixed logit model
	Number of obs		8550		Individuals	475				Number of obs		112986		Individuals	6277
	Log-likelihood		-2059.01							Log-likelihood		-22472.1
	Numer of Halton draws		5000							Numer of Halton draws		5000
	choice		Coefficient	Standard error	Z-score	p-value	95% Confidence Interval			choice		Coefficient	Standard error	Z-score	p-value	95% Confidence Interval
mean	moment1		0.080337	0.0832466	0.965048	0.334548	-0.0828264	0.2435	mean	asc		0.590405	0.0530094	11.1377	8.5074e-29	0.486507	0.694303
	asc		2.73603	0.109563	24.9723	6.51514e-133	2.52129	2.95078		cap1		-0.09417	0.0435201	-2.16383	0.0304797	-0.179469	-0.00887058
	cap1		-0.00415	0.0872754	-0.0475506	0.962076	-0.17521	0.16691		cap1*moment1		0.043383	0.0185742	2.33566	0.0195106	0.00697762	0.0797884
	cap1*moment1		0.056101	0.0483425	1.16049	0.245882	-0.0386504	0.150852		cap1*type1		-0.02147	0.0179444	-1.19648	0.231513	-0.0566409	0.0137009
	cap1*type1		-0.02327	0.0487647	-0.477189	0.63324	-0.118849	0.0723089		cap1*rate1		-0.05126	0.0306268	-1.6737	0.0941927	-0.111288	0.0087685
	cap1*rate1		-0.16361	0.0653529	-2.50349	0.0123162	-0.291702	-0.0355183		cap1*rate2		-0.09401	0.0373363	-2.51792	0.0118062	-0.167189	-0.0208308
	cap1*rate2		0.036317	0.0686513	0.529007	0.596814	-0.0982395	0.170874		type1*moderatehealth		0.548627	0.211854	2.58965	0.00960859	0.133394	0.96386
	type1*moderatehealth		0.834125	0.332482	2.50879	0.0121331	0.182461	1.48579		type1*goodhealth		1.35551	0.217748	6.22516	4.82739e-10	0.928729	1.7823
	type1*goodhealth		0.410335	0.389876	1.05248	0.292611	-0.353821	1.17449		rate1*moderatehealth		0.578159	0.150147	3.85063	0.000117879	0.283872	0.872446
	rate1*moderatehealth		0.173568	0.27698	0.626644	0.530909	-0.369313	0.716449		rate1*goodhealth		0.831677	0.155409	5.35153	8.73819e-08	0.527075	1.13628
	rate1*goodhealth		0.674023	0.320308	2.1043	0.0353815	0.04622	1.30183		rate2*moderatehealth		0.680542	0.133113	5.11252	3.184e-07	0.419641	0.941443
	rate2*moderatehealth		0.298362	0.250603	1.19058	0.233854	-0.19282	0.789544		rate2*goodhealth		0.828653	0.136912	6.05243	1.43122e-09	0.560305	1.097
	rate2*goodhealth		0.506591	0.28742	1.76255	0.0780123	-0.0567513	1.06993		cap1*moderatehealth		0.128239	0.111866	1.14636	0.251648	-0.0910183	0.347496
	cap1*moderatehealth		0.097301	0.210416	0.462422	0.643791	-0.315115	0.509717		cap1*goodhealth		0.296853	0.121631	2.44061	0.0146639	0.058457	0.535249
	cap1*goodhealth		-0.01842	0.24246	-0.0759712	0.939444	-0.493642	0.456802		moment1*moderatehealth		0.456317	0.23251	1.96257	0.0496989	0.000596979	0.912037
	moment1*moderatehealth		-0.13327	0.206516	-0.645324	0.518734	-0.538042	0.271502		moment1*goodhealth		0.110317	0.238183	0.463161	0.64325	-0.356521	0.577155
	moment1*goodhealth		0.247297	0.232725	1.06261	0.287987	-0.208844	0.703438		type1		1.45863	0.097432	14.9707	1.2759e-50	1.26766	1.64959
	type1		0.985029	0.142615	6.90692	5.30716e-12	0.705504	1.26455		rate1		0.64802	0.0667458	9.70878	2.82241e-22	0.517198	0.778842
	rate1		0.625312	0.129159	4.84142	1.31176e-06	0.372161	0.878463		rate2		0.30465	0.0574891	5.29926	1.16489e-07	0.191971	0.417329
	rate2		0.162616	0.118072	1.37726	0.168468	-0.0688051	0.394037		moment1		1.53798	0.109307	14.0703	6.31514e-45	1.32373	1.75222
sd	type1		1.65407	0.0947418	17.4587	4.27146e-67	1.46838	1.83977	sd	type1		3.00524	0.0837138	35.899	1.22267e-280	2.84116	3.16932
	rate1		0.774026	0.107893	7.17398	7.89231e-13	0.562555	0.985497		rate1		-1.1273	0.0461519	-24.4259	1.99758e-131	-1.21776	-1.03684
	rate2		0.004399	0.252816	0.0174	0.986118	-0.491121	0.499919		rate2		-0.86205	0.0432088	-19.9508	2.09642e-88	-0.946739	-0.777361
										moment1		3.83262	0.104317	36.7402	9.16416e-294	3.62816	4.03708
Type:	Diagnostic tests								Type:	Diagnostic tests
Group:	Forgoing healthcare								Group:	Utilizing healthcare
Output									Output
	Mixed logit model									Mixed logit model
	Number of obs		13284		Individuals	738				Number of obs		99180		Individuals	5510
	Log-likelihood		-3106.02							Log-likelihood		-20204.7
	Numer of Halton draws		5000							Numer of Halton draws		5000
	choice		Coefficient	Standard error	Z-score	p-value	95% Confidence Interval			choice		Coefficient	Standard error	Z-score	p-value	95% Confidence Interval
mean	asc		5.36696	0.260448	20.6067	6.7386e-93	4.85648	5.87744	mean	asc		1.50013	0.058258	25.7497	9.8201e-146	1.38594	1.61431
	cap1		-0.12453	0.144347	-0.862714	0.38831	-0.40745	0.15839		cap1		-0.06635	0.0441135	-1.50408	0.132565	-0.152812	0.0201124
	cap1*moment1		0.020882	0.0576194	0.362412	0.71705	-0.0920521	0.133816		cap1*moment1		-0.07643	0.0202485	-3.77461	0.000160352	-0.116117	-0.036743
	cap1*type1		-0.05655	0.0528299	-1.07042	0.284451	-0.160097	0.0469966		cap1*type1		-0.05745	0.0190788	-3.0112	0.00260284	-0.0948444	-0.0200556
	cap1*rate1		0.03563	0.08228	0.433033	0.664997	-0.125639	0.196899		cap1*rate1		-0.05473	0.0332866	-1.6442	0.100137	-0.119972	0.0105118
	cap1*rate2		-0.15967	0.0911537	-1.75166	0.079856	-0.338331	0.0189913		cap1*rate2		-0.01516	0.0385616	-0.393137	0.694219	-0.0907408	0.0604208
	type1*moderatehealth		0.833994	0.539979	1.54449	0.122492	-0.224364	1.89235		type1*moderatehealth		0.52415	0.252598	2.07503	0.0379861	0.0290569	1.01924
	type1*goodhealth		1.51507	0.579734	2.61339	0.00897492	0.378795	2.65135		type1*goodhealth		1.69604	0.256907	6.60179	4.08254e-11	1.19251	2.19958
	rate1*moderatehealth		1.242	0.452637	2.74393	0.00607902	0.354835	2.12917		rate1*moderatehealth		0.334724	0.153379	2.18234	0.0290869	0.0341019	0.635346
	rate1*goodhealth		1.82375	0.480092	3.79875	0.000146079	0.882766	2.76473		rate1*goodhealth		0.892485	0.158745	5.62213	1.89126e-08	0.581345	1.20363
	rate2*moderatehealth		1.1787	0.44043	2.67625	0.0074542	0.315459	2.04195		rate2*moderatehealth		0.494994	0.144423	3.42739	0.000609659	0.211925	0.778063
	rate2*goodhealth		1.7625	0.466905	3.77486	0.000160797	0.847365	2.67763		rate2*goodhealth		0.923782	0.148614	6.216	5.12011e-10	0.632499	1.21506
	cap1*moderatehealth		0.237308	0.319992	0.741606	0.458339	-0.389877	0.864493		cap1*moderatehealth		0.085932	0.109941	0.78162	0.43444	-0.129552	0.301416
	cap1*goodhealth		0.318452	0.332396	0.95805	0.338055	-0.333044	0.969948		cap1*goodhealth		0.271522	0.117754	2.30584	0.0211216	0.0407242	0.50232
	moment1*moderatehealth		0.626372	0.460993	1.35874	0.174251	-0.277175	1.52992		moment1*moderatehealth		0.699522	0.277798	2.51809	0.0118008	0.155037	1.24401
	moment1*goodhealth		0.131209	0.487684	0.269045	0.787899	-0.824652	1.08707		moment1*goodhealth		-0.0163	0.279939	-0.0582269	0.953568	-0.564981	0.532381
	type1		0.234164	0.238353	0.982427	0.325908	-0.233007	0.701335		type1		0.340443	0.107536	3.16585	0.00154677	0.129672	0.551214
	rate1		0.7165	0.225222	3.1813	0.00146951	0.275065	1.15794		rate1		0.52698	0.0681836	7.72884	1.09543e-14	0.39334	0.66062
	rate2		0.141131	0.216155	0.652916	0.513822	-0.282533	0.564795		rate2		0.213801	0.0630317	3.39196	0.000694222	0.0902588	0.337343
	moment1		0.256489	0.203831	1.25834	0.20829	-0.143019	0.655997		moment1		3.32549	0.148189	22.4408	2.98069e-111	3.03504	3.61594
sd	type1		2.78795	0.151175	18.4418	5.22473e-75	2.49165	3.08425	sd	type1		3.25302	0.0915423	35.5357	7.4968e-275	3.07359	3.43244
	rate1		-1.47995	0.128043	-11.5582	9.41127e-31	-1.73091	-1.22899		rate1		-0.93022	0.0479583	-19.3964	1.18307e-83	-1.02422	-0.836222
	rate2		1.40081	0.129201	10.8421	2.82916e-27	1.14758	1.65404		rate2		0.839619	0.0472017	17.7879	1.13003e-70	0.747104	0.932134
	moment1		1.92866	0.114865	16.7906	1.26215e-62	1.70352	2.1538		moment1		4.72337	0.130227	36.2704	3.606e-286	4.46813	4.97862
Type:	Specialist care								Type:	Specialist care
Group:	Forgoing healthcare								Group:	Utilizing healthcare
Output									Output
	Mixed logit model									Mixed logit model
	Number of obs		11916		Individuals	662				Number of obs		84636		Individuals	4702
	Log-likelihood		-2101.47							Log-likelihood		-17377.3
	Numer of Halton draws		5000							Numer of Halton draws		5000
	choice		Coefficient	Standard error	Z-score	p-value	95% Confidence Interval			choice		Coefficient	Standard error	Z-score	p-value	95% Confidence Interval
mean	asc		5.83665	0.278174	20.982	5.1656e-96	5.29143	6.38187	mean	asc		1.9731	0.0626738	31.482	2.74043e-216	1.85026	2.09594
	cap1		-0.2318	0.146922	-1.57771	0.114659	-0.519767	0.0561666		cap1		-0.01153	0.0443734	-0.25984	0.794988	-0.0985019	0.0754419
	cap1*moment1		-0.04765	0.0602661	-0.79066	0.429158	-0.165772	0.0704715		cap1*moment1		-0.05502	0.0208567	-2.63801	0.00834101	-0.095899	-0.014141
	cap1*type1		-0.08858	0.0607701	-1.45763	0.14497	-0.207689	0.0305293		cap1*type1		0.039807	0.0202237	1.96833	0.0490334	0.000168453	0.0794455
	cap1*rate1		0.05348	0.0924554	0.578441	0.562977	-0.127733	0.234693		cap1*rate1		-0.11501	0.0343366	-3.34949	0.000809958	-0.18231	-0.0477103
	cap1*rate2		0.013729	0.0985241	0.139347	0.889179	-0.179378	0.206836		cap1*rate2		0.009351	0.0401622	0.232831	0.815893	-0.0693669	0.0880689
	type1*moderatehealth		0.287008	0.578154	0.496421	0.619606	-0.846174	1.42019		type1*moderatehealth		0.180977	0.282264	0.641162	0.521419	-0.372261	0.734215
	type1*goodhealth		1.23256	0.612255	2.01316	0.0441206	0.0325455	2.43258		type1*goodhealth		1.17252	0.292467	4.00906	6.10141e-05	0.599281	1.74575
	rate1*moderatehealth		0.862428	0.444362	1.94082	0.0523035	-0.00852243	1.73338		rate1*moderatehealth		0.1696	0.154554	1.09735	0.272492	-0.133326	0.472526
	rate1*goodhealth		2.03487	0.464605	4.37978	1.19814e-05	1.12424	2.94549		rate1*goodhealth		0.586756	0.162049	3.62085	0.000293811	0.269139	0.904373
	rate2*moderatehealth		0.618907	0.396699	1.56014	0.118753	-0.158623	1.39644		rate2*moderatehealth		0.318601	0.133948	2.37855	0.0173832	0.0560634	0.581139
	rate2*goodhealth		1.1962	0.408223	2.93027	0.00339312	0.396086	1.99632		rate2*goodhealth		0.582479	0.139524	4.17475	2.98608e-05	0.309012	0.855946
	cap1*moderatehealth		0.399727	0.329156	1.2144	0.22462	-0.24542	1.04487		cap1*moderatehealth		-0.06539	0.109804	-0.595514	0.551502	-0.280607	0.149827
	cap1*goodhealth		0.735877	0.337237	2.18207	0.0291235	0.0748919	1.39686		cap1*goodhealth		0.019548	0.117397	0.166512	0.867754	-0.21055	0.249646
	moment1*moderatehealth		0.70241	0.477102	1.47224	0.140981	-0.232709	1.63753		moment1*moderatehealth		1.41685	0.305482	4.6381	3.52147e-06	0.818111	2.0156
	moment1*goodhealth		0.419059	0.505447	0.829085	0.407073	-0.571618	1.40974		moment1*goodhealth		0.979167	0.316315	3.09555	0.00196514	0.35919	1.59914
	type1		-1.27685	0.25242	-5.05843	4.29017e-07	-1.77159	-0.782106		type1		-0.86175	0.119323	-7.22199	5.16617e-13	-1.09562	-0.627877
	rate1		0.106286	0.223455	0.475649	0.634333	-0.331685	0.544257		rate1		0.443983	0.0704415	6.30286	2.93628e-10	0.305918	0.582048
	rate2		0.04667	0.200479	0.232792	0.815927	-0.34627	0.43961		rate2		0.106565	0.0599833	1.77658	0.0756415	-0.0110023	0.224132
	moment1		0.43218	0.207875	2.07904	0.0376352	0.0247451	0.839615		moment1		3.61343	0.160991	22.445	3.03141e-111	3.29789	3.92898
sd	type1		2.6018	0.133623	19.4712	3.74912e-83	2.3399	2.8637	sd	type1		3.31654	0.0941169	35.2385	4.71038e-270	3.13207	3.50101
	rate1		-1.02715	0.131404	-7.81674	5.87614e-15	-1.2847	-0.769598		rate1		-0.87177	0.0504579	-17.2772	9.1035e-67	-0.970667	-0.772873
	rate2		-0.02205	0.309834	-0.0711672	0.943266	-0.629324	0.585224		rate2		0.397889	0.0735867	5.40708	6.42338e-08	0.253659	0.542119
	moment1		1.91265	0.106939	17.8854	1.28069e-70	1.70305	2.12225		moment1		4.92392	0.137186	35.8923	5.20081e-280	4.65504	5.19281

## Sheet: income
MONTHLY NET INCOME
Interaction terms:
	Type of health service:		Prescribed medication							Type of health service:		Diagnostic tests							Type of health service:		Specialist care
	Group:		Forgoing healthcare			Utilizing healthcare				Group:		Forgoing healthcare			Utilizing healthcare				Group:		Forgoing healthcare			Utilizing healthcare
			Coef.	SE	P-value	Coef.	SE	P-value				Coef.	SE	P-value	Coef.	SE	P-value				Coef.	SE	P-value	Coef.	SE	P-value
	(only subset of estimated variables are shown)									(only subset of estimated variables are shown)									(only subset of estimated variables are shown)
	Interaction terms:									Interaction terms:									Interaction terms:
		type1*income1001-2000	0.360463	0.357992	0.31401	0.27934	0.312616	0.371562			type1*income1001-2000	0.504369	0.503739	0.316724	0.585294	0.383372	0.126839			type1*income1001-2000	0.730295	0.609934	0.2312	0.516715	0.4221	0.220897
		type1*income2001-3000	1.65829	0.464257	0.000356336	0.661139	0.318462	0.0378927			type1*income2001-3000	1.40319	0.64692	0.0300981	1.05436	0.390647	0.00695599			type1*income2001-3000	1.88967	0.724852	0.00914613	0.806126	0.434637	0.0636408
		type1*income3001-4000	0.39487	0.772625	0.609311	0.614653	0.350711	0.0796747			type1*income3001-4000	1.26856	0.931358	0.173205	1.65167	0.431074	0.000127431			type1*income3001-4000	2.5586	1.01995	0.0121359	2.01918	0.47827	2.4256e-05
		type1*income4001+	0.873056	1.44578	0.545951	1.1548	0.414076	0.00529029			type1*income4001+	0.71196	1.31209	0.587404	2.00489	0.49076	4.40565e-05			type1*income4001+	0.515859	1.51444	0.73339	2.1722	0.561038	0.00010814
		type1*income_unknown	-0.18018	0.501521	0.719404	0.911139	0.334226	0.00640943			type1*income_unknown	0.511205	0.660723	0.439119	1.24277	0.405461	0.00217666			type1*income_unknown	1.23781	0.747435	0.097732	0.99916	0.449404	0.0261982
		rate1*income1001-2000	0.550701	0.298163	0.0647844	-0.01575	0.216536	0.942016			rate1*income1001-2000	0.86507	0.416667	0.0378975	0.294339	0.227238	0.195223			rate1*income1001-2000	0.556321	0.45039	0.216781	0.098935	0.233737	0.672096
		rate1*income2001-3000	0.278868	0.385821	0.469828	-0.02194	0.222733	0.921533			rate1*income2001-3000	1.33779	0.521966	0.0103885	0.820804	0.235304	0.000486368			rate1*income2001-3000	1.07452	0.532364	0.0435717	0.26093	0.241218	0.27938
		rate1*income3001-4000	0.530689	0.623442	0.394669	0.214435	0.252412	0.395581			rate1*income3001-4000	1.73696	0.706992	0.0140294	0.791648	0.264934	0.0028079			rate1*income3001-4000	0.9343	0.715933	0.191914	0.146687	0.275514	0.594442
		rate1*income4001+	0.417316	1.14902	0.716469	0.155369	0.300957	0.605681			rate1*income4001+	2.59258	0.980297	0.0081863	1.08353	0.314582	0.0005727			rate1*income4001+	2.04152	1.05284	0.052518	0.33231	0.330885	0.315234
		rate1*income_unknown	0.858491	0.412558	0.0374729	0.034162	0.233328	0.883597			rate1*income_unknown	1.25491	0.535462	0.0191135	0.494297	0.242704	0.0416899			rate1*income_unknown	0.5141	0.579794	0.375261	0.208702	0.248558	0.401106
		rate2*income1001-2000	0.421476	0.269894	0.118412	-0.01072	0.191747	0.955416			rate2*income1001-2000	0.789555	0.412585	0.0556825	-0.02863	0.213042	0.893097			rate2*income1001-2000	0.2582	0.403399	0.522146	-0.01071	0.202514	0.957824
		rate2*income2001-3000	-0.00397	0.338373	0.990639	-0.02978	0.196721	0.879674			rate2*income2001-3000	1.13257	0.513868	0.0275407	0.402953	0.21924	0.0660717			rate2*income2001-3000	1.0358	0.462949	0.0252791	0.040892	0.207981	0.84413
		rate2*income3001-4000	0.25027	0.571841	0.661646	0.206543	0.221813	0.351774			rate2*income3001-4000	2.01239	0.686802	0.0033944	0.294899	0.246879	0.232281			rate2*income3001-4000	0.294664	0.629396	0.639672	0.18167	0.235533	0.440524
		rate2*income4001+	0.264712	0.919423	0.773422	0.175703	0.263759	0.505317			rate2*income4001+	2.04276	0.963919	0.0340903	0.636417	0.290696	0.0285781			rate2*income4001+	1.51873	0.866562	0.0796972	0.034362	0.279482	0.902148
		rate2*income_unknown	0.750197	0.367836	0.0414318	-0.05113	0.20599	0.803968			rate2*income_unknown	1.2294	0.523739	0.0189223	0.253875	0.227119	0.263652			rate2*income_unknown	0.532622	0.516166	0.302148	0.03655	0.214399	0.864636
		cap1*income1001-2000	-0.08717	0.228541	0.702901	0.111229	0.156176	0.476341			cap1*income1001-2000	-0.2338	0.295413	0.428705	-0.16521	0.158578	0.297497			cap1*income1001-2000	0.182476	0.324835	0.574297	0.020952	0.164259	0.898502
		cap1*income2001-3000	-0.05864	0.291438	0.84054	0.291041	0.16855	0.0842176			cap1*income2001-3000	0.094422	0.35841	0.79221	-0.1552	0.170693	0.363228			cap1*income2001-3000	0.51669	0.37447	0.167678	0.07561	0.173231	0.662498
		cap1*income3001-4000	0.056848	0.477682	0.905272	0.271132	0.205268	0.186548			cap1*income3001-4000	0.76035	0.471834	0.107099	0.043206	0.207649	0.835173			cap1*income3001-4000	0.844576	0.499023	0.0905847	0.035105	0.209688	0.867044
		cap1*income4001+	0.46761	0.845016	0.580022	0.815036	0.307974	0.00813543			cap1*income4001+	-0.31561	0.662427	0.633765	0.385382	0.28643	0.178477			cap1*income4001+	0.590392	0.707002	0.403698	0.248862	0.272749	0.36155
		cap1*income_unknown	0.039486	0.309752	0.898566	0.182865	0.172592	0.289364			cap1*income_unknown	-0.2523	0.371567	0.497139	-0.1361	0.172334	0.429678			cap1*income_unknown	0.078335	0.420526	0.852229	-0.01058	0.175533	0.951938
		moment1*income1001-2000	-0.19193	0.225468	0.394654	0.816866	0.345654	0.0181174			moment1*income1001-2000	0.473654	0.431806	0.272698	0.775014	0.421903	0.0662204			moment1*income1001-2000	0.239157	0.481382	0.61933	0.431108	0.454302	0.342651
		moment1*income2001-3000	0.056125	0.280847	0.841609	1.69346	0.353086	1.61949e-06			moment1*income2001-3000	0.068753	0.549652	0.900458	1.74519	0.430884	5.12022e-05			moment1*income2001-3000	0.183008	0.581975	0.753177	1.96196	0.468541	2.82473e-05
		moment1*income3001-4000	0.128016	0.457936	0.779829	2.00446	0.390328	2.82142e-07			moment1*income3001-4000	-0.21558	0.754369	0.775055	2.11869	0.478336	9.46414e-06			moment1*income3001-4000	0.957982	0.828813	0.247766	1.82253	0.518788	0.00044323
		moment1*income4001+	0.691791	0.775003	0.37208	2.36137	0.463839	3.56912e-07			moment1*income4001+	0.67541	1.06572	0.526249	2.11178	0.540614	9.37963e-05			moment1*income4001+	1.69416	1.1722	0.148404	2.29372	0.598998	0.000128622
		moment1*income_unknown	-0.22647	0.30201	0.45335	0.713744	0.370215	0.0538678			moment1*income_unknown	-0.04625	0.550479	0.933044	0.559388	0.447091	0.210874			moment1*income_unknown	-0.26029	0.60889	0.669035	0.564242	0.484166	0.243865
	Model:									Model:									Model:
	Number of individuals		475			6277				Number of individuals		738			5510				Number of individuals		662			4702
	Number of observations		8550			112986				Number of observations		13284			99180				Number of observations		11916			84636
	Log-likelihood		-2053.35			-22499				Log-likelihood		-3119.78			-20055.6				Log-likelihood		-2109.21			-17258.7
	Labels: type1 (copayments), type2 (coinsurances), rate1 (€2/40%), rate2 (€4/50%), rate3 (€7/70%), cap1 (half cap), cap2 (full cap). The level of monthly net income is enclosed in variable label (e.g. income1001-2000 indicates a monthly net income between 1001 and 2000 euros) and is compared to reference dummy (monthly net income les than 1000 euros). Respondents' characteristics are dummy coded. …									Labels: type1 (copayments), type2 (coinsurances), rate1 (€40/15%), rate2 (€50/20%), rate3 (€80/30%), cap1 (half cap), cap2 (full cap). The level of monthly net income is enclosed in variable label (e.g. income1001-2000 indicates a monthly net income between 1001 and 2000 euros) and is compared to reference dummy (monthly net income les than 1000 euros). Respondents' characteristics are dummy code…									Labels: type1 (copayments), type2 (coinsurances), rate1 (€100/5%), rate2 (€140/7%), rate3 (€200/10%), cap1 (half cap), cap2 (full cap). The level of monthly net income is enclosed in variable label (e.g. income1001-2000 indicates a monthly net income between 1001 and 2000 euros) and is compared to reference dummy (monthly net income les than 1000 euros). Respondents' characteristics are dummy cod…
Equation3:
	Vij=β1*Type1 + β2*Rate1 + β3*Rate2 + β4*Cap1 + β5*Cap1*Type1 + β6*Cap1*Rate1 + β7*Cap1*Rate2 + β8*Cap1*Moment1 + β9*Moment1 + β10*AlternativeSpecificConstant(optout)+ β11*Type1*Income1001-2000 + β12*Type1*Income2001-3000 + β13*Type1*Income3001-4000 + β14*Type1*Income4000+ + β15*Type1*Income_unknown + β16*Rate1*Income1001-2000 + β17*Rate1*Income2001-3000 + β18*Rate1*Income3001-4000 + β19*Rate1*Inc…
Full output
Type:	Prescribed medication								Type:	Prescribed medication
Group:	Forgoing healthcare								Group:	Utilizing healthcare
Output									Output
	Mixed logit model									Mixed logit model
	Number of obs		8550		Individuals	475				Number of obs		112986		Individuals	6277
	Log-likelihood		-2053.35							Log-likelihood		-22499
	Numer of Halton draws		5000							Numer of Halton draws		5000
	choice		Coefficient	Standard error	Z-score	p-value	95% Confidence Interval			choice		Coefficient	Standard error	Z-score	p-value	95% Confidence Interval
mean	moment1		0.126364	0.0932309	1.35539	0.17533	-0.0563686	0.309097	mean	asc		0.592772	0.0734575	8.06959	7.12198e-16	0.448795	0.736749
	asc		2.68486	0.116696	23.0072	1.06463e-113	2.45613	2.91358		cap1		-0.11853	0.0683447	-1.7343	0.0828682	-0.252486	0.0154256
	cap1		0.029837	0.0962705	0.309929	0.756623	-0.158853	0.218527		cap1*moment1		0.042479	0.0182483	2.32783	0.0199226	0.00671236	0.0782456
	cap1*moment1		0.055517	0.0484665	1.14547	0.252046	-0.0394773	0.150511		cap1*type1		-0.01936	0.0176352	-1.0978	0.272292	-0.053925	0.015205
	cap1*type1		-0.01973	0.0490408	-0.402318	0.68746	-0.11585	0.07639		cap1*rate1		-0.04773	0.0302324	-1.57877	0.114392	-0.106986	0.0115256
	cap1*rate1		-0.1679	0.0658559	-2.54951	0.0108049	-0.296978	-0.0388224		cap1*rate2		-0.09293	0.0368782	-2.51992	0.0117396	-0.165211	-0.0206488
	cap1*rate2		0.055486	0.0690507	0.803554	0.421677	-0.0798534	0.190825		type1*income1001-2000		0.27934	0.312616	0.893555	0.371562	-0.333388	0.892068
	type1*income1001-2000		0.360463	0.357992	1.0069	0.31401	-0.341201	1.06213		type1*income2001-3000		0.661139	0.318462	2.07604	0.0378927	0.0369536	1.28532
	type1*income2001-3000		1.65829	0.464257	3.57191	0.000356336	0.748341	2.56823		type1*income3001-4000		0.614653	0.350711	1.75259	0.0796747	-0.07274	1.30205
	type1*income3001-4000		0.39487	0.772625	0.511076	0.609311	-1.11948	1.90922		type1*income4001+		1.1548	0.414076	2.78886	0.00529029	0.343211	1.96639
	type1*income4001+		0.873056	1.44578	0.603863	0.545951	-1.96068	3.70679		type1*income_unknown		0.911139	0.334226	2.72612	0.00640943	0.256056	1.56622
	type1*income_unknown		-0.18018	0.501521	-0.359267	0.719404	-1.16316	0.802801		rate1*income1001-2000		-0.01575	0.216536	-0.072736	0.942016	-0.440161	0.408661
	rate1*income1001-2000		0.550701	0.298163	1.84698	0.0647844	-0.0336979	1.1351		rate1*income2001-3000		-0.02194	0.222733	-0.0985036	0.921533	-0.458497	0.414617
	rate1*income2001-3000		0.278868	0.385821	0.722791	0.469828	-0.477342	1.03508		rate1*income3001-4000		0.214435	0.252412	0.849542	0.395581	-0.280293	0.709163
	rate1*income3001-4000		0.530689	0.623442	0.851224	0.394669	-0.691257	1.75264		rate1*income4001+		0.155369	0.300957	0.51625	0.605681	-0.434506	0.745244
	rate1*income4001+		0.417316	1.14902	0.363193	0.716469	-1.83476	2.66939		rate1*income_unknown		0.034162	0.233328	0.146412	0.883597	-0.423161	0.491485
	rate1*income_unknown		0.858491	0.412558	2.0809	0.0374729	0.0498776	1.6671		rate2*income1001-2000		-0.01072	0.191747	-0.0559069	0.955416	-0.386545	0.365105
	rate2*income1001-2000		0.421476	0.269894	1.56163	0.118412	-0.107517	0.950469		rate2*income2001-3000		-0.02978	0.196721	-0.151382	0.879674	-0.415352	0.355792
	rate2*income2001-3000		-0.00397	0.338373	-0.0117326	0.990639	-0.66718	0.65924		rate2*income3001-4000		0.206543	0.221813	0.931158	0.351774	-0.22821	0.641296
	rate2*income3001-4000		0.25027	0.571841	0.437657	0.661646	-0.870538	1.37108		rate2*income4001+		0.175703	0.263759	0.666149	0.505317	-0.341265	0.692671
	rate2*income4001+		0.264712	0.919423	0.287911	0.773422	-1.53736	2.06678		rate2*income_unknown		-0.05113	0.20599	-0.248216	0.803968	-0.454871	0.352611
	rate2*income_unknown		0.750197	0.367836	2.03949	0.0414318	0.0292393	1.47115		cap1*income1001-2000		0.111229	0.156176	0.712202	0.476341	-0.194876	0.417334
	cap1*income1001-2000		-0.08717	0.228541	-0.381419	0.702901	-0.53511	0.36077		cap1*income2001-3000		0.291041	0.16855	1.72674	0.0842176	-0.0393164	0.621398
	cap1*income2001-3000		-0.05864	0.291438	-0.201209	0.84054	-0.629858	0.512578		cap1*income3001-4000		0.271132	0.205268	1.32087	0.186548	-0.131194	0.673458
	cap1*income3001-4000		0.056848	0.477682	0.119008	0.905272	-0.879409	0.993105		cap1*income4001+		0.815036	0.307974	2.64644	0.00813543	0.211407	1.41867
	cap1*income4001+		0.46761	0.845016	0.553374	0.580022	-1.18862	2.12384		cap1*income_unknown		0.182865	0.172592	1.05952	0.289364	-0.155415	0.521145
	cap1*income_unknown		0.039486	0.309752	0.127476	0.898566	-0.567627	0.646599		moment1*income1001-2000		0.816866	0.345654	2.36324	0.0181174	0.139383	1.49435
	moment1*income1001-2000		-0.19193	0.225468	-0.85125	0.394654	-0.633848	0.249988		moment1*income2001-3000		1.69346	0.353086	4.79615	1.61949e-06	1.00141	2.38551
	moment1*income2001-3000		0.056125	0.280847	0.199842	0.841609	-0.494335	0.606585		moment1*income3001-4000		2.00446	0.390328	5.13531	2.82142e-07	1.23941	2.7695
	moment1*income3001-4000		0.128016	0.457936	0.27955	0.779829	-0.769538	1.02557		moment1*income4001+		2.36137	0.463839	5.09091	3.56912e-07	1.45224	3.27049
	moment1*income4001+		0.691791	0.775003	0.892631	0.37208	-0.827214	2.2108		moment1*income_unknown		0.713744	0.370215	1.92792	0.0538678	-0.011877	1.43937
	moment1*income_unknown		-0.22647	0.30201	-0.749876	0.45335	-0.818409	0.365469		type1		1.50567	0.147309	10.2211	1.63463e-24	1.21694	1.79439
	type1		1.01768	0.155852	6.52978	6.96204e-11	0.712212	1.32315		rate1		0.78793	0.102528	7.68502	1.54204e-14	0.586975	0.988885
	rate1		0.528217	0.143028	3.6931	0.000222915	0.247882	0.808552		rate2		0.513152	0.0881022	5.82451	5.74364e-09	0.340472	0.685832
	rate2		0.209009	0.128953	1.62081	0.105095	-0.0437398	0.461758		moment1		0.980631	0.162653	6.02898	1.65514e-09	0.661831	1.29943
sd	type1		1.6569	0.095163	17.4111	9.54463e-67	1.47038	1.84342	sd	type1		2.91016	0.0807775	36.0269	1.30815e-282	2.75184	3.06849
	rate1		0.763764	0.109681	6.96348	3.56501e-12	0.548789	0.978739		rate1		-1.09482	0.0454203	-24.1042	4.77881e-128	-1.18384	-1.0058
	rate2		0.006544	0.25372	0.0257922	0.979424	-0.490748	0.503836		rate2		-0.84502	0.042638	-19.8185	2.90903e-87	-0.928591	-0.761449
										moment1		3.71138	0.10021	37.0361	1.91298e-298	3.51497	3.90779
Type:	Diagnostic tests								Type:	Diagnostic tests
Group:	Forgoing healthcare								Group:	Utilizing healthcare
Output									Output
	Mixed logit model									Mixed logit model
	Number of obs		13284		Individuals	738				Number of obs		99180		Individuals	5510
	Log-likelihood		-3119.78							Log-likelihood		-20055.6
	Numer of Halton draws		5000							Numer of Halton draws		5000
	choice		Coefficient	Standard error	Z-score	p-value	95% Confidence Interval			choice		Coefficient	Standard error	Z-score	p-value	95% Confidence Interval
mean	asc		4.71322	0.220515	21.3737	1.11217e-99	4.28101	5.14543	mean	asc		1.72402	0.0847644	20.339	8.95137e-92	1.55788	1.89016
	cap1		0.034303	0.127542	0.268954	0.787969	-0.21568	0.284286		cap1		0.049125	0.0709366	0.69252	0.488613	-0.0899107	0.188161
	cap1*moment1		0.003537	0.0570789	0.0619669	0.95059	-0.108338	0.115412		cap1*moment1		-0.0795	0.019975	-3.97998	6.89706e-05	-0.118651	-0.040349
	cap1*type1		-0.05996	0.0523259	-1.1459	0.251859	-0.162519	0.0425988		cap1*type1		-0.05932	0.018868	-3.14395	0.00166731	-0.0963012	-0.0223388
	cap1*rate1		0.027661	0.081388	0.339866	0.733963	-0.131859	0.187181		cap1*rate1		-0.05366	0.0331813	-1.61717	0.105844	-0.118695	0.0113754
	cap1*rate2		-0.13894	0.0903216	-1.53828	0.124004	-0.31597	0.0380904		cap1*rate2		-0.02071	0.0383275	-0.540343	0.588962	-0.095832	0.054412
	type1*income1001-2000		0.504369	0.503739	1.00125	0.316724	-0.482959	1.4917		type1*income1001-2000		0.585294	0.383372	1.5267	0.126839	-0.166115	1.3367
	type1*income2001-3000		1.40319	0.64692	2.16903	0.0300981	0.135226	2.67115		type1*income2001-3000		1.05436	0.390647	2.699	0.00695599	0.288688	1.82002
	type1*income3001-4000		1.26856	0.931358	1.36205	0.173205	-0.556905	3.09402		type1*income3001-4000		1.65167	0.431074	3.83152	0.000127431	0.806765	2.49658
	type1*income4001+		0.71196	1.31209	0.542614	0.587404	-1.85974	3.28366		type1*income4001+		2.00489	0.49076	4.08529	4.40565e-05	1.04301	2.96678
	type1*income_unknown		0.511205	0.660723	0.773705	0.439119	-0.783812	1.80622		type1*income_unknown		1.24277	0.405461	3.06509	0.00217666	0.44807	2.03748
	rate1*income1001-2000		0.86507	0.416667	2.07617	0.0378975	0.0484036	1.68174		rate1*income1001-2000		0.294339	0.227238	1.29529	0.195223	-0.151047	0.739725
	rate1*income2001-3000		1.33779	0.521966	2.56299	0.0103885	0.31474	2.36085		rate1*income2001-3000		0.820804	0.235304	3.48827	0.000486368	0.359608	1.282
	rate1*income3001-4000		1.73696	0.706992	2.45684	0.0140294	0.351259	3.12267		rate1*income3001-4000		0.791648	0.264934	2.9881	0.0028079	0.272377	1.31092
	rate1*income4001+		2.59258	0.980297	2.64469	0.0081863	0.671195	4.51396		rate1*income4001+		1.08353	0.314582	3.44434	0.0005727	0.466946	1.70011
	rate1*income_unknown		1.25491	0.535462	2.3436	0.0191135	0.205402	2.30441		rate1*income_unknown		0.494297	0.242704	2.03663	0.0416899	0.0185981	0.969996
	rate2*income1001-2000		0.789555	0.412585	1.91368	0.0556825	-0.0191107	1.59822		rate2*income1001-2000		-0.02863	0.213042	-0.134386	0.893097	-0.446193	0.388933
	rate2*income2001-3000		1.13257	0.513868	2.20401	0.0275407	0.125389	2.13975		rate2*income2001-3000		0.402953	0.21924	1.83796	0.0660717	-0.0267566	0.832663
	rate2*income3001-4000		2.01239	0.686802	2.93009	0.0033944	0.66626	3.35852		rate2*income3001-4000		0.294899	0.246879	1.19451	0.232281	-0.188983	0.778781
	rate2*income4001+		2.04276	0.963919	2.11922	0.0340903	0.153476	3.93204		rate2*income4001+		0.636417	0.290696	2.18929	0.0285781	0.0666534	1.20618
	rate2*income_unknown		1.2294	0.523739	2.34735	0.0189223	0.202869	2.25593		rate2*income_unknown		0.253875	0.227119	1.11781	0.263652	-0.191278	0.699028
	cap1*income1001-2000		-0.2338	0.295413	-0.791434	0.428705	-0.81281	0.34521		cap1*income1001-2000		-0.16521	0.158578	-1.04182	0.297497	-0.476023	0.145603
	cap1*income2001-3000		0.094422	0.35841	0.263447	0.79221	-0.608062	0.796906		cap1*income2001-3000		-0.1552	0.170693	-0.909236	0.363228	-0.489758	0.179358
	cap1*income3001-4000		0.76035	0.471834	1.61148	0.107099	-0.164444	1.68514		cap1*income3001-4000		0.043206	0.207649	0.208073	0.835173	-0.363786	0.450198
	cap1*income4001+		-0.31561	0.662427	-0.476445	0.633765	-1.61397	0.982746		cap1*income4001+		0.385382	0.28643	1.34547	0.178477	-0.17602	0.946784
	cap1*income_unknown		-0.2523	0.371567	-0.679016	0.497139	-0.980571	0.475971		cap1*income_unknown		-0.1361	0.172334	-0.789746	0.429678	-0.473875	0.201675
	moment1*income1001-2000		0.473654	0.431806	1.09692	0.272698	-0.372685	1.31999		moment1*income1001-2000		0.775014	0.421903	1.83695	0.0662204	-0.0519156	1.60194
	moment1*income2001-3000		0.068753	0.549652	0.125085	0.900458	-1.00856	1.14607		moment1*income2001-3000		1.74519	0.430884	4.05025	5.12022e-05	0.900654	2.58972
	moment1*income3001-4000		-0.21558	0.754369	-0.285775	0.775055	-1.69414	1.26298		moment1*income3001-4000		2.11869	0.478336	4.4293	9.46414e-06	1.18115	3.05623
	moment1*income4001+		0.67541	1.06572	0.633759	0.526249	-1.4134	2.76422		moment1*income4001+		2.11178	0.540614	3.90626	9.37963e-05	1.05218	3.17138
	moment1*income_unknown		-0.04625	0.550479	-0.0840178	0.933044	-1.12519	1.03269		moment1*income_unknown		0.559388	0.447091	1.25117	0.210874	-0.31691	1.43569
	type1		0.362156	0.217635	1.66405	0.0961256	-0.0644086	0.788721		type1		0.241848	0.175787	1.3758	0.168886	-0.102694	0.58639
	rate1		0.801362	0.19988	4.00922	6.12536e-05	0.409597	1.19313		rate1		0.356797	0.109083	3.27089	0.00107246	0.142995	0.570599
	rate2		0.242644	0.194859	1.24523	0.21307	-0.139279	0.624567		rate2		0.460973	0.101227	4.55383	5.27397e-06	0.262567	0.659379
	moment1		0.312382	0.184911	1.68937	0.0911728	-0.0500431	0.674807		moment1		2.72007	0.208622	13.0383	7.97702e-39	2.31117	3.12897
sd	type1		2.69548	0.14225	18.9489	4.95398e-79	2.41667	2.97429	sd	type1		3.16914	0.0889044	35.6466	1.51463e-276	2.99489	3.34339
	rate1		-1.44247	0.127295	-11.3317	1.25004e-29	-1.69197	-1.19297		rate1		-0.89949	0.0478539	-18.7966	1.10465e-78	-0.993284	-0.805696
	rate2		1.3772	0.129507	10.6342	2.63628e-26	1.12336	1.63103		rate2		0.817316	0.0463681	17.6267	1.96258e-69	0.726435	0.908197
	moment1		1.90512	0.114013	16.7097	4.78823e-62	1.68165	2.12859		moment1		4.56242	0.12528	36.4179	1.80913e-288	4.31687	4.80797
Type:	Specialist care								Type:	Specialist care
Group:	Forgoing healthcare								Group:	Utilizing healthcare
Output									Output
	Mixed logit model									Mixed logit model
	Number of obs		11916		Individuals	662				Number of obs		84636		Individuals	4702
	Log-likelihood		-2109.21							Log-likelihood		-17258.7
	Numer of Halton draws		5000							Numer of Halton draws		5000
	choice		Coefficient	Standard error	Z-score	p-value	95% Confidence Interval			choice		Coefficient	Standard error	Z-score	p-value	95% Confidence Interval
mean	asc		5.50855	0.267324	20.6063	9.87915e-93	4.98459	6.0325	mean	asc		2.03971	0.0933542	21.8492	1.55582e-105	1.85674	2.22269
	cap1		-0.12318	0.144007	-0.855375	0.392361	-0.405434	0.159074		cap1		-0.0403	0.073858	-0.545642	0.585314	-0.185062	0.104462
	cap1*moment1		-0.06539	0.0601166	-1.08772	0.276741	-0.183218	0.0524384		cap1*moment1		-0.05251	0.0205183	-2.55918	0.0104936	-0.0927258	-0.0122942
	cap1*type1		-0.09011	0.0607289	-1.48381	0.137886	-0.209139	0.0289187		cap1*type1		0.0335	0.0199499	1.6792	0.0931161	-0.00560188	0.0726019
	cap1*rate1		0.085533	0.0924013	0.925669	0.354637	-0.0955735	0.26664		cap1*rate1		-0.12088	0.0340441	-3.55069	0.000384432	-0.187606	-0.0541536
	cap1*rate2		0.010163	0.0990303	0.102625	0.918262	-0.183936	0.204262		cap1*rate2		0.009902	0.0397492	0.249112	0.803275	-0.0680065	0.0878105
	type1*income1001-2000		0.730295	0.609934	1.19734	0.2312	-0.465175	1.92576		type1*income1001-2000		0.516715	0.4221	1.22415	0.220897	-0.3106	1.34403
	type1*income2001-3000		1.88967	0.724852	2.60697	0.00914613	0.468957	3.31038		type1*income2001-3000		0.806126	0.434637	1.85471	0.0636408	-0.0457618	1.65801
	type1*income3001-4000		2.5586	1.01995	2.50855	0.0121359	0.559497	4.55771		type1*income3001-4000		2.01918	0.47827	4.22185	2.4256e-05	1.08177	2.95659
	type1*income4001+		0.515859	1.51444	0.340627	0.73339	-2.45244	3.48416		type1*income4001+		2.1722	0.561038	3.87175	0.00010814	1.07256	3.27183
	type1*income_unknown		1.23781	0.747435	1.65608	0.097732	-0.22716	2.70278		type1*income_unknown		0.99916	0.449404	2.2233	0.0261982	0.118328	1.87999
	rate1*income1001-2000		0.556321	0.45039	1.2352	0.216781	-0.326443	1.43909		rate1*income1001-2000		0.098935	0.233737	0.423275	0.672096	-0.35919	0.55706
	rate1*income2001-3000		1.07452	0.532364	2.0184	0.0435717	0.0310913	2.11796		rate1*income2001-3000		0.26093	0.241218	1.08172	0.27938	-0.211857	0.733717
	rate1*income3001-4000		0.9343	0.715933	1.30501	0.191914	-0.468929	2.33753		rate1*income3001-4000		0.146687	0.275514	0.532412	0.594442	-0.393321	0.686695
	rate1*income4001+		2.04152	1.05284	1.93906	0.052518	-0.0220499	4.10509		rate1*income4001+		0.33231	0.330885	1.00431	0.315234	-0.316225	0.980845
	rate1*income_unknown		0.5141	0.579794	0.886694	0.375261	-0.622296	1.6505		rate1*income_unknown		0.208702	0.248558	0.839652	0.401106	-0.278471	0.695875
	rate2*income1001-2000		0.2582	0.403399	0.640061	0.522146	-0.532463	1.04886		rate2*income1001-2000		-0.01071	0.202514	-0.0528852	0.957824	-0.407638	0.386218
	rate2*income2001-3000		1.0358	0.462949	2.23739	0.0252791	0.128418	1.94318		rate2*income2001-3000		0.040892	0.207981	0.196614	0.84413	-0.36675	0.448534
	rate2*income3001-4000		0.294664	0.629396	0.46817	0.639672	-0.938952	1.52828		rate2*income3001-4000		0.18167	0.235533	0.771313	0.440524	-0.279976	0.643316
	rate2*income4001+		1.51873	0.866562	1.7526	0.0796972	-0.179729	3.21719		rate2*income4001+		0.034362	0.279482	0.122949	0.902148	-0.513422	0.582146
	rate2*income_unknown		0.532622	0.516166	1.03188	0.302148	-0.479063	1.54431		rate2*income_unknown		0.03655	0.214399	0.170476	0.864636	-0.383672	0.456772
	cap1*income1001-2000		0.182476	0.324835	0.561749	0.574297	-0.454201	0.819153		cap1*income1001-2000		0.020952	0.164259	0.127555	0.898502	-0.300996	0.3429
	cap1*income2001-3000		0.51669	0.37447	1.37979	0.167678	-0.217272	1.25065		cap1*income2001-3000		0.07561	0.173231	0.436469	0.662498	-0.263923	0.415143
	cap1*income3001-4000		0.844576	0.499023	1.69246	0.0905847	-0.133509	1.82266		cap1*income3001-4000		0.035105	0.209688	0.167416	0.867044	-0.375883	0.446093
	cap1*income4001+		0.590392	0.707002	0.835064	0.403698	-0.795332	1.97612		cap1*income4001+		0.248862	0.272749	0.912421	0.36155	-0.285726	0.78345
	cap1*income_unknown		0.078335	0.420526	0.186279	0.852229	-0.745896	0.902566		cap1*income_unknown		-0.01058	0.175533	-0.0602734	0.951938	-0.354626	0.333466
	moment1*income1001-2000		0.239157	0.481382	0.496813	0.61933	-0.704352	1.18267		moment1*income1001-2000		0.431108	0.454302	0.948947	0.342651	-0.459323	1.32154
	moment1*income2001-3000		0.183008	0.581975	0.31446	0.753177	-0.957663	1.32368		moment1*income2001-3000		1.96196	0.468541	4.18738	2.82473e-05	1.04362	2.8803
	moment1*income3001-4000		0.957982	0.828813	1.15585	0.247766	-0.666491	2.58246		moment1*income3001-4000		1.82253	0.518788	3.51305	0.00044323	0.805702	2.83935
	moment1*income4001+		1.69416	1.1722	1.44529	0.148404	-0.603348	3.99167		moment1*income4001+		2.29372	0.598998	3.82926	0.000128622	1.11968	3.46776
	moment1*income_unknown		-0.26029	0.60889	-0.427483	0.669035	-1.45371	0.933134		moment1*income_unknown		0.564242	0.484166	1.16539	0.243865	-0.384724	1.51321
	type1		-1.46623	0.267253	-5.48631	4.1881e-08	-1.99005	-0.942415		type1		-1.06567	0.192881	-5.52502	3.30421e-08	-1.44372	-0.687624
	rate1		0.372255	0.221402	1.68135	0.092721	-0.0616936	0.806204		rate1		0.397874	0.116108	3.42677	0.000611106	0.170303	0.625445
	rate2		0.070764	0.197347	0.358576	0.719919	-0.316037	0.457565		rate2		0.271905	0.098661	2.75595	0.00585343	0.0785294	0.465281
	moment1		0.539581	0.208379	2.58942	0.00962559	0.131157	0.948005		moment1		3.34089	0.226769	14.7326	4.58179e-49	2.89643	3.78536
sd	type1		2.55827	0.132902	19.2492	2.4456e-81	2.29778	2.81876	sd	type1		3.17528	0.0910385	34.8785	1.22617e-264	2.99685	3.35372
	rate1		-1.05847	0.134153	-7.89003	3.2847e-15	-1.32141	-0.79553		rate1		-0.83931	0.0498598	-16.8334	1.76441e-63	-0.937035	-0.741585
	rate2		0.017816	0.2511	0.0709519	0.943437	-0.474339	0.509971		rate2		0.377563	0.0755513	4.99744	5.82129e-07	0.229482	0.525644
	moment1		1.90843	0.107699	17.7201	2.27196e-69	1.69734	2.11952		moment1		4.6413	0.128868	36.0159	6.649e-282	4.38872	4.89388

## Sheet: financialsituation
FINANCIAL SITUATION
Interaction terms:
	Type of health service:		Prescribed medication							Type of health service:		Diagnostic tests							Type of health service:		Specialist care
	Group:		Forgoing healthcare			Utilizing healthcare				Group:		Forgoing healthcare			Utilizing healthcare				Group:		Forgoing healthcare			Utilizing healthcare
			Coef.	SE	P-value	Coef.	SE	P-value				Coef.	SE	P-value	Coef.	SE	P-value				Coef.	SE	P-value	Coef.	SE	P-value
	(only subset of estimated variables are shown)									(only subset of estimated variables are shown)									(only subset of estimated variables are shown)
	Interaction terms:									Interaction terms:									Interaction terms:
		type1*moderatefinsit	1.04593	0.314166	0.000874512	0.577268	0.217516	0.00795747			type1*moderatefinsit	1.17055	0.428788	0.00634365	0.678671	0.256885	0.00824496			type1*moderatefinsit	0.586735	0.453613	0.195874	0.129125	0.280549	0.645333
		type1*goodfinsit	1.06763	0.437753	0.0147525	1.00547	0.209311	1.55938e-06			type1*goodfinsit	1.55371	0.497798	0.00180517	1.38335	0.246142	1.91312e-08			type1*goodfinsit	1.02589	0.556971	0.0655134	1.12657	0.272197	3.49478e-05
		rate1*moderatefinsit	0.128794	0.256704	0.615876	0.324228	0.153704	0.0349099			rate1*moderatefinsit	0.358268	0.34047	0.292693	0.181556	0.155785	0.243849			rate1*moderatefinsit	0.18533	0.33494	0.580053	0.310658	0.154687	0.0446142
		rate1*goodfinsit	-0.46464	0.367849	0.206578	0.659271	0.14969	1.06247e-05			rate1*goodfinsit	0.893493	0.390692	0.0222143	0.602859	0.151984	7.29543e-05			rate1*goodfinsit	1.01113	0.396204	0.0107216	0.462725	0.152908	0.00247758
		rate2*moderatefinsit	-0.05115	0.226702	0.821498	0.179806	0.136169	0.186684			rate2*moderatefinsit	-0.04941	0.329662	0.880861	0.1968	0.145969	0.177588			rate2*moderatefinsit	0.369563	0.297553	0.214259	0.170538	0.133435	0.201233
		rate2*goodfinsit	-0.37473	0.322452	0.245216	0.443786	0.13159	0.000745186			rate2*goodfinsit	0.527619	0.377478	0.162213	0.536867	0.141439	0.000147286			rate2*goodfinsit	0.595765	0.35137	0.0899976	0.275062	0.130365	0.0348665
		cap1*moderatefinsit	0.129292	0.192159	0.501068	0.127779	0.112841	0.257475			cap1*moderatefinsit	-0.12553	0.234331	0.592178	0.004203	0.109927	0.969501			cap1*moderatefinsit	-0.23976	0.241663	0.321156	-0.09084	0.109918	0.408561
		cap1*goodfinsit	-0.11538	0.277867	0.67798	0.411521	0.120241	0.000620801			cap1*goodfinsit	0.046935	0.262777	0.858246	0.247234	0.116181	0.0333388			cap1*goodfinsit	0.142056	0.280052	0.611989	0.003017	0.11414	0.978913
		moment1*moderatefinsit	-0.15668	0.184621	0.396096	0.166242	0.239606	0.4878			moment1*moderatefinsit	-0.00703	0.353231	0.984122	0.230344	0.283866	0.417108			moment1*moderatefinsit	-0.0508	0.363252	0.888783	0.649984	0.303335	0.0321325
		moment1*goodfinsit	0.083459	0.268634	0.756052	1.05257	0.231041	5.22509e-06			moment1*goodfinsit	0.098163	0.403676	0.807875	1.45095	0.272292	9.91656e-08			moment1*goodfinsit	0.375715	0.446777	0.400396	1.86873	0.295963	2.73116e-10
	Model:									Model:									Model:
	Number of individuals		475			6277				Number of individuals		738			5510				Number of individuals		662			4702
	Number of observations		8550			112986				Number of observations		13284			99180				Number of observations		11916			84636
	Log-likelihood		-2063.49			-22387.9				Log-likelihood		-3140.82			-19967				Log-likelihood		-2142.27			-17186
	Labels: type1 (copayments), type2 (coinsurances), rate1 (€2/40%), rate2 (€4/50%), rate3 (€7/70%), cap1 (half cap), cap2 (full cap). The level of financial situation is enclosed in variable label (e.g. moderatefinsit indicates a moderate financial situation or precisely enhoug to live from) and is compared to reference dummy (poor financial situation or runnings debts/usings savings). Respondents'…									Labels: type1 (copayments), type2 (coinsurances), rate1 (€40/15%), rate2 (€50/20%), rate3 (€80/30%), cap1 (half cap), cap2 (full cap). The level of financial situation is enclosed in variable label (e.g. moderatefinsit indicates a moderate financial situation or precisely enhoug to live from) and is compared to reference dummy (poor financial situation or runnings debts/usings savings). Responden…									Labels: type1 (copayments), type2 (coinsurances), rate1 (€100/5%), rate2 (€140/7%), rate3 (€200/10%), cap1 (half cap), cap2 (full cap). The level of financial situation is enclosed in variable label (e.g. moderatefinsit indicates a moderate financial situation or precisely enhoug to live from) and is compared to reference dummy (poor financial situation or runnings debts/usings savings). Responde…
Equation4:
	Vij=β1*Type1 + β2*Rate1 + β3*Rate2 + β4*Cap1 + β5*Cap1*Type1 + β6*Cap1*Rate1 + β7*Cap1*Rate2 + β8*Cap1*Moment1 + β9*Moment1 + β10*AlternativeSpecificConstant(optout) + β11*Type1*Moderatefinsit + β12*Type1*Goodfinsit + β13*Rate1*Moderatefinsit + β14*Rate1*Goodfinsit + β15*Rate2*Moderatefinsit + β16*Rate2*Goodfinsit + β17*Cap1*Moderatefinsit + β18*Cap1*Goodfinsit + β19*Moment1*Moderatefinsit + β20*…
Full output
Type:	Prescribed medication								Type:	Prescribed medication
Group:	Forgoing healthcare								Group:	Utilizing healthcare
Output									Output
	Mixed logit model									Mixed logit model
	Number of obs		8550		Individuals	475				Number of obs		112986		Individuals	6277
	Log-likelihood		-2063.49							Log-likelihood		-22387.9
	Numer of Halton draws		5000							Numer of Halton draws		5000
	choice		Coefficient	Standard error	Z-score	p-value	95% Confidence Interval			choice		Coefficient	Standard error	Z-score	p-value	95% Confidence Interval
mean	moment1		0.107526	0.0626179	1.71718	0.0859831	-0.0152051	0.230257	mean	asc		0.518367	0.0517494	10.0169	1.31459e-23	0.416938	0.619796
	asc		2.53916	0.0910055	27.9011	4.9046e-164	2.36078	2.71753		cap1		-0.11368	0.0429185	-2.64874	0.00808038	-0.1978	-0.0295597
	cap1		0.001555	0.0681909	0.0228036	0.981807	-0.132099	0.135209		cap1*moment1		0.044709	0.0187083	2.3898	0.0168593	0.00804076	0.0813772
	cap1*moment1		0.05915	0.0484974	1.21965	0.22263	-0.0359049	0.154205		cap1*type1		-0.02215	0.0180555	-1.22678	0.21991	-0.0575387	0.0132387
	cap1*type1		-0.02323	0.048734	-0.47667	0.63361	-0.118749	0.0722886		cap1*rate1		-0.05328	0.0308221	-1.72863	0.0838778	-0.113691	0.00713126
	cap1*rate1		-0.17201	0.0654905	-2.62649	0.00864245	-0.300371	-0.0436487		cap1*rate2		-0.0936	0.0375899	-2.49003	0.0127746	-0.167276	-0.0199238
	cap1*rate2		0.043326	0.0689928	0.627979	0.530034	-0.0918998	0.178552		type1*moderatefinsit		0.577268	0.217516	2.65392	0.00795747	0.150938	1.0036
	type1*moderatefinsit		1.04593	0.314166	3.32924	0.000874512	0.430168	1.6617		type1*goodfinsit		1.00547	0.209311	4.80373	1.55938e-06	0.595223	1.41572
	type1*goodfinsit		1.06763	0.437753	2.43889	0.0147525	0.209637	1.92563		rate1*moderatefinsit		0.324228	0.153704	2.10943	0.0349099	0.0229676	0.625488
	rate1*moderatefinsit		0.128794	0.256704	0.501722	0.615876	-0.374346	0.631934		rate1*goodfinsit		0.659271	0.14969	4.40425	1.06247e-05	0.365879	0.952663
	rate1*goodfinsit		-0.46464	0.367849	-1.26313	0.206578	-1.18562	0.256344		rate2*moderatefinsit		0.179806	0.136169	1.32046	0.186684	-0.0870853	0.446697
	rate2*moderatefinsit		-0.05115	0.226702	-0.225626	0.821498	-0.495487	0.393187		rate2*goodfinsit		0.443786	0.13159	3.37248	0.000745186	0.185869	0.701703
	rate2*goodfinsit		-0.37473	0.322452	-1.16213	0.245216	-1.00674	0.257275		cap1*moderatefinsit		0.127779	0.112841	1.13239	0.257475	-0.0933886	0.348947
	cap1*moderatefinsit		0.129292	0.192159	0.672839	0.501068	-0.247339	0.505923		cap1*goodfinsit		0.411521	0.120241	3.42246	0.000620801	0.175848	0.647194
	cap1*goodfinsit		-0.11538	0.277867	-0.415235	0.67798	-0.659999	0.429239		moment1*moderatefinsit		0.166242	0.239606	0.693814	0.4878	-0.303386	0.63587
	moment1*moderatefinsit		-0.15668	0.184621	-0.848656	0.396096	-0.518538	0.205178		moment1*goodfinsit		1.05257	0.231041	4.55576	5.22509e-06	0.599727	1.50541
	moment1*goodfinsit		0.083459	0.268634	0.31068	0.756052	-0.443063	0.609981		type1		1.5287	0.0966488	15.8171	2.72665e-56	1.33927	1.71814
	type1		0.967501	0.115845	8.35171	7.78255e-17	0.740445	1.19456		rate1		0.643276	0.0653835	9.83851	7.84833e-23	0.515124	0.771428
	rate1		0.692134	0.09995	6.9248	4.68128e-12	0.496232	0.888036		rate2		0.491736	0.0567627	8.66302	4.65347e-18	0.380481	0.602991
	rate2		0.303565	0.0895545	3.38973	0.000702791	0.128038	0.479092		moment1		1.39854	0.107773	12.9767	1.76751e-38	1.1873	1.60977
sd	type1		1.67755	0.0956086	17.546	9.72504e-68	1.49016	1.86494	sd	type1		3.02332	0.0841249	35.9385	3.00513e-281	2.85844	3.1882
	rate1		0.777336	0.108582	7.15899	8.79947e-13	0.564516	0.990156		rate1		-1.14231	0.0467333	-24.4432	1.31009e-131	-1.23391	-1.05071
	rate2		0.006031	0.271836	0.0221861	0.9823	-0.526768	0.53883		rate2		-0.8806	0.0435201	-20.2343	7.08191e-91	-0.965899	-0.795301
										moment1		3.87302	0.105451	36.728	1.42618e-293	3.66633	4.0797
Type:	Diagnostic tests								Type:	Diagnostic tests
Group:	Forgoing healthcare								Group:	Utilizing healthcare
Output									Output
	Mixed logit model									Mixed logit model
	Number of obs		13284		Individuals	738				Number of obs		99180		Individuals	5510
	Log-likelihood		-3140.82							Log-likelihood		-19967
	Numer of Halton draws		5000							Numer of Halton draws		5000
	choice		Coefficient	Standard error	Z-score	p-value	95% Confidence Interval			choice		Coefficient	Standard error	Z-score	p-value	95% Confidence Interval
mean	asc		4.24689	0.177598	23.913	9.09805e-124	3.8988	4.59498	mean	asc		1.48022	0.0561605	26.3569	1.43895e-152	1.37014	1.59029
	cap1		0.006038	0.0839762	0.0719013	0.942682	-0.158555	0.170631		cap1		-0.04577	0.0426615	-1.07287	0.283334	-0.129386	0.0378465
	cap1*moment1		0.015745	0.0568859	0.276782	0.781952	-0.0957513	0.127241		cap1*moment1		-0.08187	0.0203224	-4.02856	5.61615e-05	-0.121702	-0.0420381
	cap1*type1		-0.05407	0.0521344	-1.03713	0.299696	-0.156254	0.0481135		cap1*type1		-0.06103	0.0191572	-3.18574	0.00144429	-0.0985782	-0.0234818
	cap1*rate1		0.034549	0.0811911	0.425527	0.67046	-0.124586	0.193684		cap1*rate1		-0.05814	0.0335261	-1.73417	0.0828909	-0.123851	0.00757117
	cap1*rate2		-0.13455	0.0895712	-1.50216	0.13308	-0.31011	0.0410096		cap1*rate2		-0.01495	0.038833	-0.384982	0.700252	-0.0910626	0.0611626
	type1*moderatefinsit		1.17055	0.428788	2.7299	0.00634365	0.330125	2.01097		type1*moderatefinsit		0.678671	0.256885	2.64192	0.00824496	0.175176	1.18217
	type1*goodfinsit		1.55371	0.497798	3.12117	0.00180517	0.578031	2.5294		type1*goodfinsit		1.38335	0.246142	5.62014	1.91312e-08	0.900915	1.86579
	rate1*moderatefinsit		0.358268	0.34047	1.05227	0.292693	-0.309054	1.02559		rate1*moderatefinsit		0.181556	0.155785	1.16543	0.243849	-0.123783	0.486895
	rate1*goodfinsit		0.893493	0.390692	2.28695	0.0222143	0.127737	1.65925		rate1*goodfinsit		0.602859	0.151984	3.96661	7.29543e-05	0.304971	0.900747
	rate2*moderatefinsit		-0.04941	0.329662	-0.149881	0.880861	-0.695547	0.596727		rate2*moderatefinsit		0.1968	0.145969	1.34823	0.177588	-0.0892996	0.4829
	rate2*goodfinsit		0.527619	0.377478	1.39775	0.162213	-0.212239	1.26748		rate2*goodfinsit		0.536867	0.141439	3.79575	0.000147286	0.259646	0.814088
	cap1*moderatefinsit		-0.12553	0.234331	-0.535695	0.592178	-0.584819	0.333759		cap1*moderatefinsit		0.004203	0.109927	0.0382344	0.969501	-0.211254	0.21966
	cap1*goodfinsit		0.046935	0.262777	0.178611	0.858246	-0.468109	0.561979		cap1*goodfinsit		0.247234	0.116181	2.12801	0.0333388	0.0195194	0.474949
	moment1*moderatefinsit		-0.00703	0.353231	-0.019902	0.984122	-0.699362	0.685302		moment1*moderatefinsit		0.230344	0.283866	0.811453	0.417108	-0.326034	0.786722
	moment1*goodfinsit		0.098163	0.403676	0.243173	0.807875	-0.693041	0.889367		moment1*goodfinsit		1.45095	0.272292	5.32864	9.91656e-08	0.917254	1.98464
	type1		0.27335	0.156112	1.75098	0.0799716	-0.0326298	0.57933		type1		0.335758	0.106028	3.16668	0.00154235	0.127943	0.543573
	rate1		0.928004	0.140752	6.59321	4.467e-11	0.652131	1.20388		rate1		0.547448	0.066174	8.27285	1.32387e-16	0.417747	0.677149
	rate2		0.566958	0.130518	4.3439	1.41014e-05	0.311142	0.822774		rate2		0.33719	0.0608441	5.54187	3.00013e-08	0.217936	0.456444
	moment1		0.414371	0.124848	3.31901	0.000905814	0.169669	0.659073		moment1		3.01716	0.144243	20.9173	6.04719e-97	2.73445	3.29988
sd	type1		2.67441	0.141333	18.9228	8.03509e-79	2.3974	2.95142	sd	type1		3.21931	0.0899778	35.7789	1.41934e-278	3.04295	3.39567
	rate1		-1.473	0.128938	-11.4241	4.37922e-30	-1.72572	-1.22028		rate1		-0.93327	0.0478017	-19.5238	9.95103e-85	-1.02696	-0.839579
	rate2		1.38788	0.130296	10.6518	2.18557e-26	1.1325	1.64326		rate2		0.838952	0.0468935	17.8906	1.80974e-71	0.747041	0.930863
	moment1		1.87295	0.113035	16.5696	4.73659e-61	1.6514	2.0945		moment1		4.66649	0.127797	36.515	5.48576e-290	4.41601	4.91697
Type:	Specialist care								Type:	Specialist care
Group:	Forgoing healthcare								Group:	Utilizing healthcare
Output									Output
	Mixed logit model									Mixed logit model
	Number of obs		11916		Individuals	662				Number of obs		84636		Individuals	4702
	Log-likelihood		-2142.27							Log-likelihood		-17186
	Numer of Halton draws		5000							Numer of Halton draws		5000
	choice		Coefficient	Standard error	Z-score	p-value	95% Confidence Interval			choice		Coefficient	Standard error	Z-score	p-value	95% Confidence Interval
mean	asc		4.73113	0.17791	26.5928	2.04968e-151	4.38243	5.07984	mean	asc		1.87425	0.0593549	31.577	1.41526e-217	1.75791	1.99059
	cap1		0.039563	0.0868965	0.455289	0.64891	-0.130754	0.20988		cap1		-0.00443	0.0430929	-0.102801	0.918121	-0.0888921	0.0800321
	cap1*moment1		-0.05531	0.0583181	-0.948419	0.342935	-0.169613	0.0589935		cap1*moment1		-0.04892	0.0205913	-2.37577	0.0175148	-0.0892789	-0.00856113
	cap1*type1		-0.07508	0.0590424	-1.27163	0.20353	-0.190803	0.040643		cap1*type1		0.039452	0.020025	1.97014	0.0488257	0.000203031	0.078701
	cap1*rate1		0.077323	0.0896103	0.862881	0.38822	-0.0983131	0.252959		cap1*rate1		-0.11125	0.0342199	-3.25103	0.00115031	-0.178321	-0.044179
	cap1*rate2		-0.00355	0.0959479	-0.0369992	0.970486	-0.191608	0.184508		cap1*rate2		0.007395	0.039975	0.184991	0.853237	-0.070956	0.085746
	type1*moderatefinsit		0.586735	0.453613	1.29347	0.195874	-0.302347	1.47582		type1*moderatefinsit		0.129125	0.280549	0.460258	0.645333	-0.420752	0.679002
	type1*goodfinsit		1.02589	0.556971	1.84191	0.0655134	-0.0657737	2.11755		type1*goodfinsit		1.12657	0.272197	4.13879	3.49478e-05	0.59306	1.66007
	rate1*moderatefinsit		0.18533	0.33494	0.553322	0.580053	-0.471153	0.841813		rate1*moderatefinsit		0.310658	0.154687	2.0083	0.0446142	0.00747191	0.613844
	rate1*goodfinsit		1.01113	0.396204	2.55205	0.0107216	0.234571	1.78769		rate1*goodfinsit		0.462725	0.152908	3.02616	0.00247758	0.163024	0.762426
	rate2*moderatefinsit		0.369563	0.297553	1.24201	0.214259	-0.213642	0.952768		rate2*moderatefinsit		0.170538	0.133435	1.27806	0.201233	-0.0909953	0.432071
	rate2*goodfinsit		0.595765	0.35137	1.69555	0.0899976	-0.0929205	1.28445		rate2*goodfinsit		0.275062	0.130365	2.10994	0.0348665	0.0195468	0.530577
	cap1*moderatefinsit		-0.23976	0.241663	-0.992125	0.321156	-0.713419	0.233899		cap1*moderatefinsit		-0.09084	0.109918	-0.826433	0.408561	-0.30628	0.1246
	cap1*goodfinsit		0.142056	0.280052	0.507249	0.611989	-0.406845	0.690957		cap1*goodfinsit		0.003017	0.11414	0.0264324	0.978913	-0.220698	0.226732
	moment1*moderatefinsit		-0.0508	0.363252	-0.139848	0.888783	-0.762774	0.661174		moment1*moderatefinsit		0.649984	0.303335	2.14279	0.0321325	0.0554478	1.24452
	moment1*goodfinsit		0.375715	0.446777	0.840945	0.400396	-0.499969	1.2514		moment1*goodfinsit		1.86873	0.295963	6.31408	2.73116e-10	1.28865	2.44882
	type1		-1.1604	0.166958	-6.95025	3.83661e-12	-1.48764	-0.833162		type1		-0.8637	0.114556	-7.53957	4.76217e-14	-1.08823	-0.639171
	rate1		0.523112	0.13342	3.92078	8.87571e-05	0.261608	0.784616		rate1		0.363945	0.0681909	5.33715	9.4662e-08	0.230291	0.497599
	rate2		0.056245	0.118448	0.474849	0.634904	-0.175914	0.288404		rate2		0.221659	0.0573672	3.86386	0.000111692	0.109219	0.334099
	moment1		0.58365	0.131374	4.44268	8.9648e-06	0.326158	0.841142		moment1		3.39184	0.154383	21.9704	1.10113e-106	3.08925	3.69443
sd	type1		2.52457	0.126803	19.9094	8.62609e-87	2.27604	2.77311	sd	type1		3.19792	0.090857	35.1973	1.97662e-269	3.01984	3.376
	rate1		-0.97126	0.132786	-7.3145	2.74891e-13	-1.23152	-0.711		rate1		-0.84381	0.0500899	-16.8459	1.42795e-63	-0.941986	-0.745634
	rate2		0.021389	0.215754	0.0991358	0.921032	-0.40149	0.444268		rate2		0.377888	0.075379	5.01317	5.36482e-07	0.230145	0.525631
	moment1		1.80502	0.0997246	18.1001	2.94562e-72	1.60956	2.00048		moment1		4.69909	0.130457	36.0202	5.58487e-282	4.44339	4.95478

## Sheet: senseofmastery
SENSE OF MASTERY
Interaction terms:
	Type of health service:		Prescribed medication							Type of health service:		Diagnostic tests							Type of health service:		Specialist care
	Group:		Forgoing healthcare			Utilizing healthcare				Group:		Forgoing healthcare			Utilizing healthcare				Group:		Forgoing healthcare			Utilizing healthcare
			Coef.	SE	P-value	Coef.	SE	P-value				Coef.	SE	P-value	Coef.	SE	P-value				Coef.	SE	P-value	Coef.	SE	P-value
	(only subset of estimated variables are shown)									(only subset of estimated variables are shown)									(only subset of estimated variables are shown)
	Interaction terms:									Interaction terms:									Interaction terms:
		type1*masteryq2	0.891585	0.349746	0.0108132	0.560984	0.204805	0.00616143			type1*masteryq2	1.27172	0.463495	0.00608211	0.365727	0.244544	0.134776			type1*masteryq2	0.101334	0.503899	0.840624	-0.00175	0.274678	0.994917
		type1*masteryq3	0.71406	0.412442	0.0834343	0.816654	0.210922	0.000108081			type1*masteryq3	1.00468	0.522558	0.0545493	1.09708	0.250649	1.20467e-05			type1*masteryq3	0.615283	0.538553	0.25328	0.647999	0.286473	0.0237007
		type1*masteryq4	0.025336	0.514564	0.960731	0.996647	0.22968	1.43073e-05			type1*masteryq4	1.89478	0.597966	0.00153461	1.68806	0.269709	3.89441e-10			type1*masteryq4	0.523567	0.651868	0.421887	1.35145	0.314579	1.74046e-05
		rate1*masteryq2	-0.03357	0.289781	0.907777	0.509576	0.146584	0.000508516			rate1*masteryq2	0.71425	0.370819	0.0541082	0.425907	0.14855	0.00414337			rate1*masteryq2	0.772706	0.377266	0.0405652	0.124024	0.150649	0.410359
		rate1*masteryq3	0.06566	0.336134	0.845132	0.557713	0.153062	0.000268862			rate1*masteryq3	1.32696	0.412821	0.00131037	0.82146	0.155502	1.27618e-07			rate1*masteryq3	0.862043	0.396288	0.0296276	0.388505	0.161527	0.0161657
		rate1*masteryq4	0.551113	0.412557	0.181635	0.610977	0.167102	0.000255981			rate1*masteryq4	1.05893	0.474005	0.0254988	0.94263	0.170737	3.37996e-08			rate1*masteryq4	1.01397	0.478254	0.0340141	0.609044	0.177623	0.000606424
		rate2*masteryq2	0.095569	0.25842	0.711526	0.447073	0.128853	0.000521339			rate2*masteryq2	0.613975	0.361866	0.0897784	0.238361	0.139395	0.0872752			rate2*masteryq2	0.500478	0.331125	0.130701	0.205091	0.128857	0.111473
		rate2*masteryq3	0.439169	0.289455	0.129246	0.609122	0.133903	5.39622e-06			rate2*masteryq3	1.4062	0.399182	0.000428598	0.443224	0.144848	0.00221455			rate2*masteryq3	0.38673	0.352169	0.272167	0.347409	0.13708	0.0112675
		rate2*masteryq4	0.606134	0.358096	0.0905574	0.568323	0.145238	9.11898e-05			rate2*masteryq4	1.03976	0.458333	0.023311	0.557328	0.158392	0.000433919			rate2*masteryq4	0.692046	0.423602	0.102345	0.586933	0.149793	8.92498e-05
		cap1*masteryq2	0.178001	0.218458	0.415206	-0.04369	0.115421	0.70504			cap1*masteryq2	-0.04758	0.255163	0.85208	0.037922	0.109257	0.728524			cap1*masteryq2	0.290237	0.266978	0.277005	0.079804	0.108083	0.4603
		cap1*masteryq3	0.185514	0.13474	0.168603	0.275679	0.12798	0.0312367			cap1*masteryq3	-0.34161	0.278404	0.219834	0.13884	0.121132	0.251721			cap1*masteryq3	0.318587	0.285892	0.265146	0.028424	0.119432	0.811887
		cap1*masteryq4	0.290575	0.310495	0.349379	0.26349	0.141035	0.0617293			cap1*masteryq4	-0.14515	0.317519	0.647579	0.162598	0.137637	0.237466			cap1*masteryq4	0.433392	0.338433	0.200365	0.130489	0.137931	0.344129
		moment1*masteryq2	0.360253	0.211627	0.0887352	0.611131	0.22575	0.00678808			moment1*masteryq2	-0.41805	0.385249	0.277879	0.979575	0.268808	0.000268427			moment1*masteryq2	-0.52465	0.405511	0.195759	1.29957	0.297204	1.22885e-05
		moment1*masteryq3	0.653369	0.237874	0.00603236	0.70324	0.232781	0.00251967			moment1*masteryq3	-0.00904	0.425736	0.983059	0.878857	0.27718	0.00152117			moment1*masteryq3	0.165982	0.436936	0.704043	1.34131	0.308717	1.39576e-05
		moment1*masteryq4	0.727283	0.289938	0.012146	0.479464	0.252872	0.0579523			moment1*masteryq4	-0.16539	0.493142	0.737344	0.544984	0.29773	0.0671834			moment1*masteryq4	0.215261	0.527586	0.683273	1.13006	0.341927	0.000950222
	Model:									Model:									Model:
	Number of individuals		475			6277				Number of individuals		738			5510				Number of individuals		662			4702
	Number of observations		8550			112986				Number of observations		13284			99180				Number of observations		11916			84636
	Log-likelihood		-2036.17			-22469.9				Log-likelihood		-3123.79			-20108.5				Log-likelihood		-2145.9			-17282.8
	Labels: type1 (copayments), type2 (coinsurances), rate1 (€2/40%), rate2 (€4/50%), rate3 (€7/70%), cap1 (half cap), cap2 (full cap). The level of mastery is enclosed in variable label (e.g. masteryq4 indicates a mastery score ranked in fourth/highest quartile of the total population) and is compared to reference dummy (a mastery score ranked in first/lowest quartile). Respondents' characteristics …									Labels: type1 (copayments), type2 (coinsurances), rate1 (€40/15%), rate2 (€50/20%), rate3 (€80/30%), cap1 (half cap), cap2 (full cap). The level of mastery is enclosed in variable label (e.g. masteryq4 indicates a mastery score ranked in fourth/highest quartile of the total population) and is compared to reference dummy (a mastery score ranked in first/lowest quartile). Respondents' characteristi…									Labels: type1 (copayments), type2 (coinsurances), rate1 (€100/5%), rate2 (€140/7%), rate3 (€200/10%), cap1 (half cap), cap2 (full cap). The level of mastery is enclosed in variable label (e.g. masteryq4 indicates a mastery score ranked in fourth/highest quartile of the total population) and is compared to reference dummy (a mastery score ranked in first/lowest quartile). Respondents' characterist…
Equation5:
	Vij=β1*Type1 + β2*Rate1 + β3*Rate2 + β4*Cap1 + β5*Cap1*Type1 + β6*Cap1*Rate1 + β7*Cap1*Rate2 + β8*Cap1*Moment1 + β9*Moment1 + β10*AlternativeSpecificConstant(optout)+ β11*Type1*Masteryq2 + β12*Type1*Masteryq3 + β13*Type1*Masteryq4 + β14*Rate1*Masteryq2 + β15*Rate1*Masteryq3 + β16*Rate1*Masteryq4 + β17*Rate2*Masteryq2 + β18*Rate2*Masteryq3 + β19*Rate2*Masteryq4 + β20*Cap1*Masteryq2 + β21*Cap1*Mast…
Full output
Type:	Prescribed medication								Type:	Prescribed medication
Group:	Forgoing healthcare								Group:	Utilizing healthcare
Output									Output
	Mixed logit model									Mixed logit model
	Number of obs		8550		Individuals	475				Number of obs		112986		Individuals	6277
	Log-likelihood		-2036.17							Log-likelihood		-22469.9
	Numer of Halton draws		5000							Numer of Halton draws		5000
	choice		Coefficient	Standard error	Z-score	p-value	95% Confidence Interval			choice		Coefficient	Standard error	Z-score	p-value	95% Confidence Interval
mean	moment1		-0.07054	0.0677274	-1.04153	0.29766	-0.203286	0.0622057	mean	asc		0.401341	0.044911	8.93636	4.08062e-19	0.313315	0.489367
	asc		2.77932	0.0996695	27.8854	7.33141e-164	2.58397	2.97468		cap1		-0.06315	0.0361386	-1.74744	0.0805641	-0.133982	0.0076817
	cap1		-0.0403	0.0731574	-0.550867	0.581739	-0.183688	0.103088		cap1*moment1		0.042375	0.0184391	2.29811	0.0215575	0.00623439	0.0785156
	cap1*moment1		0.049507	0.048816	1.01416	0.310537	-0.0461723	0.145186		cap1*type1		-0.02257	0.0178326	-1.26566	0.205636	-0.0575218	0.0123818
	cap1*type1		-0.02173	0.0493052	-0.440725	0.659424	-0.118368	0.0749081		cap1*rate1		-0.05303	0.0304795	-1.73986	0.0818867	-0.11277	0.00670982
	cap1*rate1		-0.16496	0.0661816	-2.49254	0.0127022	-0.294676	-0.0352441		cap1*rate2		-0.09263	0.0372156	-2.48901	0.0128113	-0.165573	-0.0196874
	cap1*rate2		0.03324	0.0692315	0.480128	0.631148	-0.102454	0.168934		type1*masteryq2		0.560984	0.204805	2.73912	0.00616143	0.159567	0.962401
	type1*masteryq2		0.891585	0.349746	2.54924	0.0108132	0.206084	1.57709		type1*masteryq3		0.816654	0.210922	3.87183	0.000108081	0.403247	1.23006
	type1*masteryq3		0.71406	0.412442	1.7313	0.0834343	-0.0943254	1.52245		type1*masteryq4		0.996647	0.22968	4.33928	1.43073e-05	0.546474	1.44682
	type1*masteryq4		0.025336	0.514564	0.0492378	0.960731	-0.983209	1.03388		rate1*masteryq2		0.509576	0.146584	3.47633	0.000508516	0.22227	0.796882
	rate1*masteryq2		-0.03357	0.289781	-0.115846	0.907777	-0.601541	0.534401		rate1*masteryq3		0.557713	0.153062	3.6437	0.000268862	0.257711	0.857715
	rate1*masteryq3		0.06566	0.336134	0.195339	0.845132	-0.593162	0.724482		rate1*masteryq4		0.610977	0.167102	3.65632	0.000255981	0.283458	0.938496
	rate1*masteryq4		0.551113	0.412557	1.33585	0.181635	-0.257498	1.35972		rate2*masteryq2		0.447073	0.128853	3.46965	0.000521339	0.194522	0.699624
	rate2*masteryq2		0.095569	0.25842	0.36982	0.711526	-0.410935	0.602073		rate2*masteryq3		0.609122	0.133903	4.54898	5.39622e-06	0.346672	0.871572
	rate2*masteryq3		0.439169	0.289455	1.51723	0.129246	-0.128162	1.0065		rate2*masteryq4		0.568323	0.145238	3.91305	9.11898e-05	0.283657	0.852989
	rate2*masteryq4		0.606134	0.358096	1.69266	0.0905574	-0.0957349	1.308		cap1*masteryq2		-0.04369	0.115421	-0.378527	0.70504	-0.269915	0.182535
	cap1*masteryq2		0.178001	0.218458	0.814806	0.415206	-0.250177	0.606179		cap1*masteryq3		0.275679	0.12798	2.15407	0.0312367	0.0248373	0.526521
	cap1*masteryq3		0.185514	0.13474	1.37682	0.168603	-0.0785774	0.449605		cap1*masteryq4		0.26349	0.141035	1.86825	0.0617293	-0.0129395	0.539919
	cap1*masteryq4		0.290575	0.310495	0.935845	0.349379	-0.317995	0.899145		moment1*masteryq2		0.611131	0.22575	2.70712	0.00678808	0.168661	1.0536
	moment1*masteryq2		0.360253	0.211627	1.7023	0.0887352	-0.054536	0.775042		moment1*masteryq3		0.70324	0.232781	3.02104	0.00251967	0.246989	1.15949
	moment1*masteryq3		0.653369	0.237874	2.7467	0.00603236	0.187136	1.1196		moment1*masteryq4		0.479464	0.252872	1.89608	0.0579523	-0.0161642	0.975092
	moment1*masteryq4		0.727283	0.289938	2.50841	0.012146	0.159005	1.29556		type1		1.55079	0.0839107	18.4815	3.77217e-76	1.38633	1.71526
	type1		1.07723	0.122041	8.82675	1.29138e-18	0.838025	1.31643		rate1		0.681224	0.0547449	12.4436	1.59844e-35	0.573924	0.788524
	rate1		0.735247	0.107065	6.86727	7.00138e-12	0.525399	0.945095		rate2		0.397014	0.0468935	8.46629	2.56306e-17	0.305103	0.488925
	rate2		0.164661	0.0969381	1.69862	0.0894273	-0.0253377	0.35466		moment1		1.42266	0.0933756	15.2359	2.30253e-52	1.23965	1.60568
sd	type1		1.69551	0.0970567	17.4693	3.57309e-67	1.50528	1.88574	sd	type1		2.97219	0.082456	36.0457	6.59457e-283	2.81057	3.1338
	rate1		0.78578	0.108812	7.22146	5.58392e-13	0.572509	0.999051		rate1		-1.11877	0.0460435	-24.2981	4.43615e-130	-1.20902	-1.02852
	rate2		0.009428	0.288038	0.0327318	0.973889	-0.555127	0.573983		rate2		-0.85078	0.0428369	-19.8609	1.25245e-87	-0.93474	-0.76682
										moment1		3.80124	0.102937	36.9278	9.85125e-297	3.59948	4.00299
Type:	Diagnostic tests								Type:	Diagnostic tests
Group:	Forgoing healthcare								Group:	Utilizing healthcare
Output									Output
	Mixed logit model									Mixed logit model
	Number of obs		13284		Individuals	738				Number of obs		99180		Individuals	5510
	Log-likelihood		-3123.79							Log-likelihood		-20108.5
	Numer of Halton draws		5000							Numer of Halton draws		5000
	choice		Coefficient	Standard error	Z-score	p-value	95% Confidence Interval			choice		Coefficient	Standard error	Z-score	p-value	95% Confidence Interval
mean	asc		4.40747	0.181634	24.2657	2.61461e-127	4.05147	4.76348	mean	asc		1.38231	0.0492849	28.0474	2.03705e-172	1.28571	1.47891
	cap1		0.045244	0.08747	0.517252	0.604989	-0.126197	0.216685		cap1		-0.03334	0.0359305	-0.927903	0.35346	-0.103764	0.0370838
	cap1*moment1		0.007938	0.0565066	0.140479	0.888284	-0.102815	0.118691		cap1*moment1		-0.07418	0.0200499	-3.69976	0.000215918	-0.113478	-0.0348821
	cap1*type1		-0.06149	0.0519808	-1.18294	0.236855	-0.163372	0.0403923		cap1*type1		-0.05789	0.0189473	-3.05532	0.00224882	-0.0950267	-0.0207533
	cap1*rate1		0.031313	0.0810987	0.38611	0.699422	-0.12764	0.190266		cap1*rate1		-0.05121	0.0331964	-1.54264	0.122922	-0.116275	0.0138549
	cap1*rate2		-0.15419	0.0896995	-1.71896	0.0856446	-0.330001	0.021621		cap1*rate2		-0.02163	0.0384187	-0.563006	0.573432	-0.0969307	0.0536707
	type1*masteryq2		1.27172	0.463495	2.74376	0.00608211	0.36327	2.18017		type1*masteryq2		0.365727	0.244544	1.49554	0.134776	-0.11358	0.845034
	type1*masteryq3		1.00468	0.522558	1.92262	0.0545493	-0.0195339	2.02889		type1*masteryq3		1.09708	0.250649	4.37696	1.20467e-05	0.60581	1.58835
	type1*masteryq4		1.89478	0.597966	3.16872	0.00153461	0.722771	3.0668		type1*masteryq4		1.68806	0.269709	6.25884	3.89441e-10	1.15944	2.21669
	rate1*masteryq2		0.71425	0.370819	1.92614	0.0541082	-0.012556	1.44106		rate1*masteryq2		0.425907	0.14855	2.8671	0.00414337	0.13475	0.717064
	rate1*masteryq3		1.32696	0.412821	3.21439	0.00131037	0.517836	2.13609		rate1*masteryq3		0.82146	0.155502	5.28262	1.27618e-07	0.516675	1.12624
	rate1*masteryq4		1.05893	0.474005	2.23401	0.0254988	0.129884	1.98798		rate1*masteryq4		0.94263	0.170737	5.52096	3.37996e-08	0.607986	1.27727
	rate2*masteryq2		0.613975	0.361866	1.69669	0.0897784	-0.0952824	1.32323		rate2*masteryq2		0.238361	0.139395	1.70997	0.0872752	-0.0348534	0.511575
	rate2*masteryq3		1.4062	0.399182	3.52271	0.000428598	0.623804	2.1886		rate2*masteryq3		0.443224	0.144848	3.05992	0.00221455	0.159322	0.727126
	rate2*masteryq4		1.03976	0.458333	2.26856	0.023311	0.141424	1.93809		rate2*masteryq4		0.557328	0.158392	3.51866	0.000433919	0.24688	0.867776
	cap1*masteryq2		-0.04758	0.255163	-0.186469	0.85208	-0.547699	0.452539		cap1*masteryq2		0.037922	0.109257	0.347091	0.728524	-0.176221	0.252065
	cap1*masteryq3		-0.34161	0.278404	-1.22703	0.219834	-0.887283	0.204063		cap1*masteryq3		0.13884	0.121132	1.14619	0.251721	-0.098579	0.376259
	cap1*masteryq4		-0.14515	0.317519	-0.457139	0.647579	-0.767486	0.477186		cap1*masteryq4		0.162598	0.137637	1.18135	0.237466	-0.107171	0.432367
	moment1*masteryq2		-0.41805	0.385249	-1.08514	0.277879	-1.17314	0.337039		moment1*masteryq2		0.979575	0.268808	3.64414	0.000268427	0.45271	1.50644
	moment1*masteryq3		-0.00904	0.425736	-0.0212338	0.983059	-0.843482	0.825402		moment1*masteryq3		0.878857	0.27718	3.1707	0.00152117	0.335583	1.42213
	moment1*masteryq4		-0.16539	0.493142	-0.33538	0.737344	-1.13195	0.801168		moment1*masteryq4		0.544984	0.29773	1.83047	0.0671834	-0.0385663	1.12853
	type1		0.244308	0.160879	1.51858	0.128891	-0.0710145	0.559631		type1		0.415398	0.0906642	4.58172	4.61729e-06	0.237696	0.5931
	rate1		0.907477	0.143837	6.30908	2.89611e-10	0.625557	1.1894		rate1		0.419972	0.0551271	7.61825	2.59413e-14	0.311923	0.528021
	rate2		0.309363	0.133974	2.30913	0.0209517	0.0467742	0.571952		rate2		0.402553	0.0515364	7.81104	5.72686e-15	0.301542	0.503564
	moment1		0.498265	0.130173	3.82772	0.000129932	0.243126	0.753404		moment1		3.08618	0.130027	23.735	3.49537e-124	2.83133	3.34104
sd	type1		2.67631	0.141623	18.8974	1.28228e-78	2.39873	2.95389	sd	type1		3.18684	0.0888988	35.848	1.23435e-279	3.0126	3.36108
	rate1		-1.4296	0.125893	-11.3557	9.52891e-30	-1.67635	-1.18285		rate1		-0.89873	0.0477703	-18.8136	8.02447e-79	-0.99236	-0.8051
	rate2		1.33763	0.12802	10.4486	1.86584e-25	1.08671	1.58855		rate2		0.829723	0.0465618	17.8198	6.4008e-71	0.738462	0.920984
	moment1		1.90045	0.112	16.9683	6.63052e-64	1.68093	2.11997		moment1		4.64148	0.127252	36.4748	2.33373e-289	4.39207	4.89089
Type:	Specialist care								Type:	Specialist care
Group:	Forgoing healthcare								Group:	Utilizing healthcare
Output									Output
	Mixed logit model									Mixed logit model
	Number of obs		11916		Individuals	662				Number of obs		84636		Individuals	4702
	Log-likelihood		-2145.9							Log-likelihood		-17282.8
	Numer of Halton draws		5000							Numer of Halton draws		5000
	choice		Coefficient	Standard error	Z-score	p-value	95% Confidence Interval			choice		Coefficient	Standard error	Z-score	p-value	95% Confidence Interval
mean	asc		4.75292	0.17931	26.5067	1.77947e-150	4.40147	5.10436	mean	asc		1.80045	0.0525452	34.2648	1.49455e-255	1.69746	1.90344
	cap1		-0.09795	0.0913455	-1.0723	0.283606	-0.276987	0.0810872		cap1		-0.04676	0.0360555	-1.29689	0.194673	-0.117429	0.0239088
	cap1*moment1		-0.0539	0.058438	-0.922345	0.356367	-0.168438	0.0606385		cap1*moment1		-0.05599	0.0206882	-2.70638	0.0068035	-0.0965388	-0.0154412
	cap1*type1		-0.08588	0.0589576	-1.45664	0.145242	-0.201437	0.0296769		cap1*type1		0.035797	0.0201246	1.77877	0.0752815	-0.00364724	0.0752412
	cap1*rate1		0.062351	0.0894036	0.697411	0.48556	-0.11288	0.237582		cap1*rate1		-0.11701	0.0342491	-3.41644	0.000634751	-0.184138	-0.0498818
	cap1*rate2		0.003082	0.0954987	0.0322727	0.974255	-0.184095	0.190259		cap1*rate2		0.012379	0.04005	0.309089	0.757255	-0.0661189	0.0908769
	type1*masteryq2		0.101334	0.503899	0.2011	0.840624	-0.886308	1.08898		type1*masteryq2		-0.00175	0.274678	-0.0063711	0.994917	-0.540119	0.536619
	type1*masteryq3		0.615283	0.538553	1.14248	0.25328	-0.44028	1.67085		type1*masteryq3		0.647999	0.286473	2.26199	0.0237007	0.0865112	1.20949
	type1*masteryq4		0.523567	0.651868	0.803179	0.421887	-0.754094	1.80123		type1*masteryq4		1.35145	0.314579	4.29607	1.74046e-05	0.734879	1.96803
	rate1*masteryq2		0.772706	0.377266	2.04817	0.0405652	0.0332637	1.51215		rate1*masteryq2		0.124024	0.150649	0.823267	0.410359	-0.171247	0.419295
	rate1*masteryq3		0.862043	0.396288	2.1753	0.0296276	0.085319	1.63877		rate1*masteryq3		0.388505	0.161527	2.4052	0.0161657	0.0719119	0.705098
	rate1*masteryq4		1.01397	0.478254	2.12015	0.0340141	0.0765919	1.95135		rate1*masteryq4		0.609044	0.177623	3.42885	0.000606424	0.260903	0.957185
	rate2*masteryq2		0.500478	0.331125	1.51145	0.130701	-0.148528	1.14948		rate2*masteryq2		0.205091	0.128857	1.59162	0.111473	-0.0474678	0.45765
	rate2*masteryq3		0.38673	0.352169	1.09814	0.272167	-0.303521	1.07698		rate2*masteryq3		0.347409	0.13708	2.53435	0.0112675	0.0787317	0.616086
	rate2*masteryq4		0.692046	0.423602	1.63372	0.102345	-0.138215	1.52231		rate2*masteryq4		0.586933	0.149793	3.91829	8.92498e-05	0.293338	0.880528
	cap1*masteryq2		0.290237	0.266978	1.08712	0.277005	-0.233039	0.813513		cap1*masteryq2		0.079804	0.108083	0.738356	0.4603	-0.132039	0.291647
	cap1*masteryq3		0.318587	0.285892	1.11436	0.265146	-0.241761	0.878935		cap1*masteryq3		0.028424	0.119432	0.237993	0.811887	-0.205663	0.262511
	cap1*masteryq4		0.433392	0.338433	1.28058	0.200365	-0.229937	1.09672		cap1*masteryq4		0.130489	0.137931	0.946045	0.344129	-0.139856	0.400834
	moment1*masteryq2		-0.52465	0.405511	-1.2938	0.195759	-1.31945	0.270151		moment1*masteryq2		1.29957	0.297204	4.37267	1.22885e-05	0.717053	1.88209
	moment1*masteryq3		0.165982	0.436936	0.379877	0.704043	-0.690412	1.02238		moment1*masteryq3		1.34131	0.308717	4.34478	1.39576e-05	0.736222	1.94639
	moment1*masteryq4		0.215261	0.527586	0.408011	0.683273	-0.818808	1.24933		moment1*masteryq4		1.13006	0.341927	3.30498	0.000950222	0.459885	1.80024
	type1		-1.05817	0.167463	-6.31881	2.72978e-10	-1.3864	-0.729942		type1		-0.80677	0.0970052	-8.31677	9.17124e-17	-0.9969	-0.61664
	rate1		0.37241	0.13767	2.70509	0.00683822	0.102577	0.642243		rate1		0.438326	0.0573847	7.63838	2.22267e-14	0.325852	0.5508
	rate2		0.115644	0.12302	0.94004	0.347216	-0.125476	0.356764		rate2		0.156822	0.0481664	3.25584	0.00113102	0.0624159	0.251228
	moment1		0.64164	0.133705	4.79893	1.61454e-06	0.379578	0.903702		moment1		3.56975	0.142734	25.0098	1.51722e-137	3.28999	3.8495
sd	type1		2.47195	0.124129	19.9143	7.84311e-87	2.22865	2.71524	sd	type1		3.23842	0.0926121	34.9676	5.58967e-266	3.0569	3.41994
	rate1		-0.98741	0.134469	-7.34301	2.22431e-13	-1.25097	-0.72385		rate1		-0.8501	0.0500899	-16.9715	1.70801e-64	-0.948276	-0.751924
	rate2		0.036312	0.221228	0.164138	0.869625	-0.397296	0.46992		rate2		0.377076	0.0752197	5.013	5.36967e-07	0.229645	0.524507
	moment1		1.79144	0.0989192	18.1102	2.46283e-72	1.59756	1.98533		moment1		4.78989	0.132288	36.2081	6.95044e-285	4.5306	5.04917

## Sheet: education
EDUCATION
Interaction terms:
	Type of health service:		Prescribed medication							Type of health service:		Diagnostic tests							Type of health service:		Specialist care
	Group:		Forgoing healthcare			Utilizing healthcare				Group:		Forgoing healthcare			Utilizing healthcare				Group:		Forgoing healthcare			Utilizing healthcare
			Coef.	SE	P-value	Coef.	SE	P-value				Coef.	SE	P-value	Coef.	SE	P-value				Coef.	SE	P-value	Coef.	SE	P-value
	(only subset of estimated variables are shown)									(only subset of estimated variables are shown)									(only subset of estimated variables are shown)
	Interaction terms:									Interaction terms:									Interaction terms:
		type1*moderateeduclevel	0.096429	0.350383	0.783161	0.458131	0.195936	0.0193805			type1*moderateeduclevel	0.601889	0.475881	0.205969	0.148246	0.237674	0.532802			type1*moderateeduclevel	0.023653	0.531753	0.964522	0.246495	0.270773	0.362647
		type1*higheduclevel	0.18571	0.35038	0.596108	0.692954	0.184068	0.000166857			type1*higheduclevel	0.633657	0.464512	0.172548	1.05745	0.22298	2.11534e-06			type1*higheduclevel	1.01773	0.510826	0.0463578	1.13297	0.253598	7.92129e-06
		rate1*moderateeduclevel	-0.02241	0.28855	0.938097	0.27822	0.139513	0.0461308			rate1*moderateeduclevel	0.124487	0.383254	0.745326	0.173347	0.145657	0.234009			rate1*moderateeduclevel	1.03188	0.388961	0.00799068	0.076909	0.147418	0.601875
		rate1*higheduclevel	-0.01923	0.286384	0.946466	0.213961	0.132276	0.105766			rate1*higheduclevel	0.423895	0.369374	0.251153	0.331823	0.138528	0.0166063			rate1*higheduclevel	0.806923	0.37492	0.0313974	0.163244	0.14052	0.245357
		rate2*moderateeduclevel	0.309776	0.260325	0.234095	0.190017	0.122601	0.121173			rate2*moderateeduclevel	0.030986	0.375867	0.934299	0.055545	0.136528	0.684128			rate2*moderateeduclevel	0.727802	0.34417	0.0344798	-0.07969	0.125499	0.52544
		rate2*higheduclevel	0.202528	0.258865	0.434019	0.221931	0.116211	0.0561712			rate2*higheduclevel	0.620065	0.360378	0.0853471	0.120389	0.129155	0.351272			rate2*higheduclevel	0.441294	0.330111	0.181311	0.152092	0.118773	0.200363
		cap1*moderateeduclevel	-0.13238	0.217922	0.543558	0.005795	0.110887	0.958321			cap1*moderateeduclevel	-0.10578	0.263317	0.687896	0.025364	0.10616	0.811167			cap1*moderateeduclevel	0.229029	0.280175	0.413688	-0.02138	0.105821	0.839886
		cap1*higheduclevel	-0.05592	0.217603	0.797199	0.179676	0.108222	0.0968661			cap1*higheduclevel	0.196213	0.249355	0.431365	0.17118	0.105295	0.104012			cap1*higheduclevel	0.485423	0.269303	0.0714893	0.063276	0.103484	0.5409
		moment1*moderateeduclevel	-0.04262	0.212179	0.840807	0.369101	0.216405	0.0880844			moment1*moderateeduclevel	-0.85294	0.397799	0.0320391	0.782574	0.262949	0.00291965			moment1*moderateeduclevel	-0.30262	0.420628	0.471879	0.594194	0.291712	0.0416613
		moment1*higheduclevel	0.344869	0.209289	0.0994284	0.623614	0.203303	0.00215969			moment1*higheduclevel	-0.32954	0.381483	0.387691	0.87882	0.246057	0.000354957			moment1*higheduclevel	-0.48504	0.407027	0.233416	0.653048	0.273602	0.0169954
	Model:									Model:									Model:
	Number of individuals		475			6277				Number of individuals		738			5510				Number of individuals		662			4702
	Number of observations		8550			112986				Number of observations		13284			99180				Number of observations		11916			84636
	Log-likelihood		-2075.48			-22636.8				Log-likelihood		-3167.42			-20324.5				Log-likelihood		-2154.01			-17484.1
	Labels: type1 (copayments), type2 (coinsurances), rate1 (€2/40%), rate2 (€4/50%), rate3 (€7/70%), cap1 (half cap), cap2 (full cap). The level of education is enclosed in variable label (e.g. higheduclevel indicates a high education level health) and is compared to reference dummy (low education level). Respondents' characteristics are dummy coded. Hence, the utility derived from the reference dum…									Labels: type1 (copayments), type2 (coinsurances), rate1 (€40/15%), rate2 (€50/20%), rate3 (€80/30%), cap1 (half cap), cap2 (full cap). The level of education is enclosed in variable label (e.g. higheduclevel indicates a high education level health) and is compared to reference dummy (low education level). Respondents' characteristics are dummy coded. Hence, the utility derived from the reference …									Labels: type1 (copayments), type2 (coinsurances), rate1 (€100/5%), rate2 (€140/7%), rate3 (€200/10%), cap1 (half cap), cap2 (full cap). The level of education is enclosed in variable label (e.g. higheduclevel indicates a high education level health) and is compared to reference dummy (low education level). Respondents' characteristics are dummy coded. Hence, the utility derived from the reference…
Equation6:
	Vij=β1*Type1 + β2*Rate1 + β3*Rate2 + β4*Cap1 + β5*Cap1*Type1 + β6*Cap1*Rate1 + β7*Cap1*Rate2 + β8*Cap1*Moment1 + β9*Moment1 + β10*AlternativeSpecificConstant(optout) + β11*Type1*Moderateeduclevel + β12*Type1*Higheduclevel + β13*Rate1*Moderateeduclevel + β14*Rate1*Higheduclevel + β15*Rate2*Moderateeduclevel + β16*Rate2*Higheduclevel + β17*Cap1*Moderateeduclevel + β18*Cap1*Higheduclevel + β19*Momen…
Full output
Type:	Prescribed medication								Type:	Prescribed medication
Group:	Forgoing healthcare								Group:	Utilizing healthcare
Output									Output
	Mixed logit model									Mixed logit model
	Number of obs		8550		Individuals	475				Number of obs		112986		Individuals	6277
	Log-likelihood		-2075.48							Log-likelihood		-22636.8
	Numer of Halton draws		5000							Numer of Halton draws		5000
	choice		Coefficient	Standard error	Z-score	p-value	95% Confidence Interval			choice		Coefficient	Standard error	Z-score	p-value	95% Confidence Interval
mean	moment1		0.028122	0.0776595	0.362119	0.717272	-0.124091	0.180335	mean	asc		0.165982	0.0442154	3.75394	0.000174162	0.0793199	0.252644
	asc		2.43499	0.10265	23.7213	1.60087e-120	2.23379	2.63618		cap1		-0.05377	0.0374967	-1.43399	0.151577	-0.127263	0.0197235
	cap1		0.046845	0.0837854	0.559107	0.576104	-0.117374	0.211064		cap1*moment1		0.039931	0.0180831	2.20819	0.0272331	0.00448804	0.075374
	cap1*moment1		0.053919	0.0481664	1.11943	0.262987	-0.0404871	0.148325		cap1*type1		-0.02139	0.0174929	-1.22278	0.221413	-0.055676	0.012896
	cap1*type1		-0.02002	0.0486415	-0.411582	0.680656	-0.115357	0.0753174		cap1*rate1		-0.05321	0.02995	-1.77663	0.0756318	-0.111912	0.00549192
	cap1*rate1		-0.16674	0.065169	-2.55858	0.0105272	-0.294471	-0.0390087		cap1*rate2		-0.09404	0.0365513	-2.57282	0.0100886	-0.165681	-0.0223994
	cap1*rate2		0.042446	0.0684982	0.619666	0.535494	-0.0918104	0.176702		type1*moderateeduclevel		0.458131	0.195936	2.33816	0.0193805	0.074096	0.842166
	type1*moderateeduclevel		0.096429	0.350383	0.275211	0.783161	-0.590321	0.783179		type1*higheduclevel		0.692954	0.184068	3.76466	0.000166857	0.332181	1.05373
	type1*higheduclevel		0.18571	0.35038	0.530025	0.596108	-0.501034	0.872454		rate1*moderateeduclevel		0.27822	0.139513	1.99422	0.0461308	0.00477366	0.551666
	rate1*moderateeduclevel		-0.02241	0.28855	-0.0776642	0.938097	-0.587968	0.543148		rate1*higheduclevel		0.213961	0.132276	1.61753	0.105766	-0.0453004	0.473222
	rate1*higheduclevel		-0.01923	0.286384	-0.0671475	0.946466	-0.580543	0.542083		rate2*moderateeduclevel		0.190017	0.122601	1.54988	0.121173	-0.0502809	0.430315
	rate2*moderateeduclevel		0.309776	0.260325	1.18996	0.234095	-0.200461	0.820013		rate2*higheduclevel		0.221931	0.116211	1.90972	0.0561712	-0.00584259	0.449705
	rate2*higheduclevel		0.202528	0.258865	0.78237	0.434019	-0.304847	0.709903		cap1*moderateeduclevel		0.005795	0.110887	0.0522603	0.958321	-0.211544	0.223134
	cap1*moderateeduclevel		-0.13238	0.217922	-0.607465	0.543558	-0.559507	0.294747		cap1*higheduclevel		0.179676	0.108222	1.66025	0.0968661	-0.0324391	0.391791
	cap1*higheduclevel		-0.05592	0.217603	-0.256982	0.797199	-0.482422	0.370582		moment1*moderateeduclevel		0.369101	0.216405	1.70561	0.0880844	-0.0550522	0.793254
	moment1*moderateeduclevel		-0.04262	0.212179	-0.200868	0.840807	-0.458491	0.373251		moment1*higheduclevel		0.623614	0.203303	3.06742	0.00215969	0.225141	1.02209
	moment1*higheduclevel		0.344869	0.209289	1.64781	0.0994284	-0.065338	0.755076		type1		1.56682	0.0830181	18.8732	2.51162e-79	1.4041	1.72953
	type1		1.18176	0.141771	8.3357	8.90135e-17	0.903889	1.45963		rate1		0.727823	0.0546077	13.3282	1.70245e-40	0.620792	0.834854
	rate1		0.765881	0.122029	6.27624	3.63742e-10	0.526705	1.00506		rate2		0.465982	0.0467012	9.97795	1.94664e-23	0.374448	0.557516
	rate2		0.133966	0.111158	1.20519	0.228163	-0.0839028	0.351835		moment1		1.41401	0.0929247	15.2167	3.08598e-52	1.23188	1.59614
sd	type1		1.6723	0.094784	17.6432	1.85679e-68	1.48652	1.85807	sd	type1		2.89213	0.0798624	36.214	1.61135e-285	2.7356	3.04866
	rate1		0.764557	0.108305	7.05929	1.80433e-12	0.552279	0.976835		rate1		-1.07859	0.0448219	-24.0639	1.25344e-127	-1.16644	-0.990739
	rate2		0.002747	0.241866	0.0113575	0.990938	-0.47131	0.476804		rate2		-0.82749	0.0420357	-19.6854	4.0133e-86	-0.90988	-0.7451
										moment1		3.7105	0.10017	37.0421	1.50863e-298	3.51417	3.90684
Type:	Diagnostic tests								Type:	Diagnostic tests
Group:	Forgoing healthcare								Group:	Utilizing healthcare
Output									Output
	Mixed logit model									Mixed logit model
	Number of obs		13284		Individuals	738				Number of obs		99180		Individuals	5510
	Log-likelihood		-3167.42							Log-likelihood		-20324.5
	Numer of Halton draws		5000							Numer of Halton draws		5000
	choice		Coefficient	Standard error	Z-score	p-value	95% Confidence Interval			choice		Coefficient	Standard error	Z-score	p-value	95% Confidence Interval
mean	asc		3.97377	0.178673	22.2405	1.27085e-107	3.62357	4.32397	mean	asc		1.15211	0.0488467	23.5863	1.16332e-122	1.05637	1.24785
	cap1		-0.02643	0.0969794	-0.272532	0.785217	-0.21651	0.16365		cap1		-0.03745	0.0372961	-1.00413	0.31532	-0.11055	0.0356504
	cap1*moment1		0.009278	0.0573062	0.161902	0.871385	-0.103042	0.121598		cap1*moment1		-0.07504	0.0199249	-3.76615	0.00016588	-0.114093	-0.0359873
	cap1*type1		-0.05408	0.0524214	-1.03164	0.302259	-0.156826	0.0486659		cap1*type1		-0.05748	0.0187883	-3.05935	0.00221876	-0.0943051	-0.0206549
	cap1*rate1		0.035627	0.0816762	0.436198	0.6627	-0.124458	0.195712		cap1*rate1		-0.05246	0.0328634	-1.59631	0.110423	-0.116872	0.0119522
	cap1*rate2		-0.14883	0.0904931	-1.64466	0.100064	-0.326196	0.0285365		cap1*rate2		-0.01974	0.0380526	-0.518756	0.603932	-0.0943231	0.0548431
	type1*moderateeduclevel		0.601889	0.475881	1.26479	0.205969	-0.330838	1.53462		type1*moderateeduclevel		0.148246	0.237674	0.623736	0.532802	-0.317595	0.614087
	type1*higheduclevel		0.633657	0.464512	1.36414	0.172548	-0.276786	1.5441		type1*higheduclevel		1.05745	0.22298	4.74236	2.11534e-06	0.620411	1.49449
	rate1*moderateeduclevel		0.124487	0.383254	0.324816	0.745326	-0.626692	0.875666		rate1*moderateeduclevel		0.173347	0.145657	1.1901	0.234009	-0.112141	0.458835
	rate1*higheduclevel		0.423895	0.369374	1.1476	0.251153	-0.300078	1.14787		rate1*higheduclevel		0.331823	0.138528	2.39535	0.0166063	0.0603082	0.603338
	rate2*moderateeduclevel		0.030986	0.375867	0.0824387	0.934299	-0.705713	0.767685		rate2*moderateeduclevel		0.055545	0.136528	0.406838	0.684128	-0.212051	0.323141
	rate2*higheduclevel		0.620065	0.360378	1.7206	0.0853471	-0.0862751	1.32641		rate2*higheduclevel		0.120389	0.129155	0.932128	0.351272	-0.132755	0.373533
	cap1*moderateeduclevel		-0.10578	0.263317	-0.401721	0.687896	-0.621882	0.410322		cap1*moderateeduclevel		0.025364	0.10616	0.238922	0.811167	-0.18271	0.233438
	cap1*higheduclevel		0.196213	0.249355	0.786882	0.431365	-0.292523	0.684949		cap1*higheduclevel		0.17118	0.105295	1.62572	0.104012	-0.0351979	0.377558
	moment1*moderateeduclevel		-0.85294	0.397799	-2.14415	0.0320391	-1.63263	-0.0732541		moment1*moderateeduclevel		0.782574	0.262949	2.97615	0.00291965	0.267195	1.29795
	moment1*higheduclevel		-0.32954	0.381483	-0.86384	0.387691	-1.07725	0.418166		moment1*higheduclevel		0.87882	0.246057	3.57161	0.000354957	0.396548	1.36109
	type1		0.453919	0.182625	2.48552	0.0129484	0.0959734	0.811865		type1		0.513682	0.0917388	5.5994	2.15662e-08	0.333874	0.69349
	rate1		1.08359	0.160009	6.77202	1.32336e-11	0.769969	1.39721		rate1		0.545777	0.0566392	9.63603	5.75889e-22	0.434764	0.65679
	rate2		0.426793	0.151407	2.81885	0.00482672	0.130036	0.72355		rate2		0.440731	0.0525357	8.38917	4.95904e-17	0.337761	0.543701
	moment1		0.620495	0.148442	4.18005	2.93308e-05	0.329549	0.911441		moment1		3.06134	0.13084	23.3977	9.60323e-121	2.8049	3.31779
sd	type1		2.74219	0.145788	18.8095	6.47897e-78	2.45644	3.02793	sd	type1		3.19019	0.0905649	35.2254	3.85526e-270	3.01268	3.36769
	rate1		-1.50601	0.129495	-11.6299	4.11149e-31	-1.75982	-1.2522		rate1		-0.90835	0.0475395	-19.1073	3.07597e-81	-1.00153	-0.815173
	rate2		1.41086	0.131011	10.769	6.23063e-27	1.15408	1.66764		rate2		0.825981	0.0466905	17.6906	6.35204e-70	0.734468	0.917494
	moment1		1.92297	0.113824	16.8942	2.27548e-63	1.69987	2.14607		moment1		4.62444	0.128849	35.8905	2.73889e-280	4.3719	4.87698
Type:	Specialist care								Type:	Specialist care
Group:	Forgoing healthcare								Group:	Utilizing healthcare
Output									Output
	Mixed logit model									Mixed logit model
	Number of obs		11916		Individuals	662				Number of obs		84636		Individuals	4702
	Log-likelihood		-2154.01							Log-likelihood		-17484.1
	Numer of Halton draws		5000							Numer of Halton draws		5000
	choice		Coefficient	Standard error	Z-score	p-value	95% Confidence Interval			choice		Coefficient	Standard error	Z-score	p-value	95% Confidence Interval
mean	asc		4.91528	0.213056	23.0703	3.0189e-115	4.49769	5.33287	mean	asc		1.54913	0.050892	30.4396	2.04966e-202	1.44939	1.64888
	cap1		-0.13318	0.109362	-1.21779	0.223327	-0.347529	0.0811691		cap1		-0.03001	0.0375366	-0.799485	0.424011	-0.103582	0.0435618
	cap1*moment1		-0.05948	0.0587537	-1.01236	0.311386	-0.174637	0.0556773		cap1*moment1		-0.05113	0.0203715	-2.50987	0.0120793	-0.0910582	-0.0112018
	cap1*type1		-0.08414	0.0593549	-1.41758	0.156341	-0.200476	0.0321955		cap1*type1		0.037407	0.0198242	1.88693	0.0591727	-0.00144849	0.0762625
	cap1*rate1		0.06269	0.0899833	0.696685	0.486014	-0.113677	0.239057		cap1*rate1		-0.11032	0.0337343	-3.27027	0.00107489	-0.176439	-0.0442009
	cap1*rate2		0.010004	0.0961249	0.104073	0.917113	-0.178401	0.198409		cap1*rate2		0.01045	0.03937	0.26543	0.790679	-0.0667153	0.0876153
	type1*moderateeduclevel		0.023653	0.531753	0.0444812	0.964522	-1.01858	1.06589		type1*moderateeduclevel		0.246495	0.270773	0.910338	0.362647	-0.28422	0.77721
	type1*higheduclevel		1.01773	0.510826	1.99233	0.0463578	0.0165144	2.01895		type1*higheduclevel		1.13297	0.253598	4.46758	7.92129e-06	0.635917	1.63002
	rate1*moderateeduclevel		1.03188	0.388961	2.65291	0.00799068	0.269516	1.79424		rate1*moderateeduclevel		0.076909	0.147418	0.521708	0.601875	-0.21203	0.365848
	rate1*higheduclevel		0.806923	0.37492	2.15225	0.0313974	0.0720798	1.54177		rate1*higheduclevel		0.163244	0.14052	1.16171	0.245357	-0.112176	0.438664
	rate2*moderateeduclevel		0.727802	0.34417	2.11466	0.0344798	0.0532288	1.40238		rate2*moderateeduclevel		-0.07969	0.125499	-0.634985	0.52544	-0.325668	0.166288
	rate2*higheduclevel		0.441294	0.330111	1.33681	0.181311	-0.205723	1.08831		rate2*higheduclevel		0.152092	0.118773	1.28053	0.200363	-0.0807029	0.384887
	cap1*moderateeduclevel		0.229029	0.280175	0.81745	0.413688	-0.320114	0.778172		cap1*moderateeduclevel		-0.02138	0.105821	-0.20204	0.839886	-0.228788	0.186028
	cap1*higheduclevel		0.485423	0.269303	1.80252	0.0714893	-0.0424105	1.01326		cap1*higheduclevel		0.063276	0.103484	0.611455	0.5409	-0.139553	0.266105
	moment1*moderateeduclevel		-0.30262	0.420628	-0.719448	0.471879	-1.12705	0.521811		moment1*moderateeduclevel		0.594194	0.291712	2.03692	0.0416613	0.0224381	1.16595
	moment1*higheduclevel		-0.48504	0.407027	-1.19167	0.233416	-1.28281	0.312733		moment1*higheduclevel		0.653048	0.273602	2.38685	0.0169954	0.116788	1.18931
	type1		-1.15372	0.207901	-5.54936	2.92841e-08	-1.56121	-0.746233		type1		-0.8702	0.102343	-8.50282	1.88003e-17	-1.07079	-0.669609
	rate1		0.312731	0.166967	1.87301	0.0610915	-0.0145244	0.639986		rate1		0.450941	0.0590847	7.63211	2.33341e-14	0.335135	0.566747
	rate2		0.093421	0.147112	0.635032	0.52542	-0.194919	0.381761		rate2		0.241906	0.0488774	4.94924	7.46464e-07	0.146106	0.337706
	moment1		0.760519	0.162379	4.6836	2.84996e-06	0.442256	1.07878		moment1		3.72582	0.148203	25.1401	5.89171e-139	3.43535	4.0163
sd	type1		2.50134	0.126917	19.7084	4.11206e-85	2.25258	2.7501	sd	type1		3.20122	0.0911702	35.1126	3.72621e-268	3.02253	3.37991
	rate1		-1.00934	0.130338	-7.74402	1.04106e-14	-1.2648	-0.753877		rate1		-0.8416	0.0497293	-16.9236	3.84282e-64	-0.939069	-0.744131
	rate2		0.014998	0.227163	0.0660231	0.947361	-0.430241	0.460237		rate2		0.344847	0.0809197	4.26159	2.03193e-05	0.186244	0.50345
	moment1		1.83376	0.100494	18.2475	2.15563e-73	1.63679	2.03073		moment1		4.73218	0.132182	35.8006	1.33025e-278	4.4731	4.99126

## Sheet: blocks
BLOCKS
Interaction terms:
	Type of health service:		Prescribed medication							Type of health service:		Diagnostic tests							Type of health service:		Specialist care
	Group:		Forgoing healthcare			Utilizing healthcare				Group:		Forgoing healthcare			Utilizing healthcare				Group:		Forgoing healthcare			Utilizing healthcare
			Coef.	SE	P-value	Coef.	SE	P-value				Coef.	SE	P-value	Coef.	SE	P-value				Coef.	SE	P-value	Coef.	SE	P-value
	(only subset of estimated variables are shown)									(only subset of estimated variables are shown)									(only subset of estimated variables are shown)
	Interaction terms:									Interaction terms:									Interaction terms:
		type1*block2	-0.25909	0.478348	0.588084	-0.42229	0.236419	0.0740708			type1*block2	0.461789	0.595561	0.438126	-0.75536	0.280275	0.0070386			type1*block2	0.672092	0.614979	0.274473	0.979863	0.322003	0.00234286
		type1*block3	-0.13636	0.532415	0.797868	0.448294	0.253967	0.077538			type1*block3	-0.01131	0.546976	0.983503	-1.24626	0.280189	8.67988e-06			type1*block3	-0.70198	0.661002	0.28826	-0.48963	0.315006	0.120105
		type1*block4	0.149619	0.459473	0.744711	0.139838	0.222969	0.530553			type1*block4	-0.16021	0.541612	0.767386	-0.51074	0.268313	0.0569754			type1*block4	0.227852	0.589267	0.699007	1.26463	0.310916	4.75753e-05
		rate1*block2	-0.02555	0.395538	0.948497	-0.02188	0.170499	0.897889			rate1*block2	-0.96654	0.456322	0.0341844	1.07632	0.179204	1.90677e-09			rate1*block2	-0.31436	0.475181	0.508267	0.006551	0.186773	0.97202
		rate1*block3	0.254184	0.505746	0.615264	0.082537	0.246858	0.738116			rate1*block3	-1.07299	0.458926	0.0193996	0.095762	0.196013	0.625162			rate1*block3	-0.63856	0.689572	0.354453	-0.23376	0.24893	0.347702
		rate1*block4	-0.03613	0.452009	0.936293	0.44351	0.208701	0.0335804			rate1*block4	0.646205	0.491352	0.18848	0.956518	0.212207	6.56811e-06			rate1*block4	-0.78399	0.532402	0.140898	-0.12867	0.220161	0.558929
		rate2*block2	0.42718	0.366115	0.243327	0.563501	0.145375	0.000106169			rate2*block2	-1.13379	0.438737	0.00977068	0.154558	0.164767	0.348225			rate2*block2	-0.19234	0.390646	0.622471	0.169438	0.154894	0.274002
		rate2*block3	-0.11837	0.403149	0.76906	0.001751	0.172537	0.991903			rate2*block3	-0.93219	0.483992	0.05412	0.204665	0.212002	0.334352			rate2*block3	-0.44886	0.458301	0.327402	0.305622	0.176513	0.0833774
		rate2*block4	0.207097	0.402446	0.606849	0.909863	0.182209	5.93761e-07			rate2*block4	-0.15899	0.451604	0.724802	0.29359	0.193959	0.130112			rate2*block4	-0.8996	0.484256	0.063237	0.289204	0.190526	0.129036
		cap1*block2	-0.03116	0.311053	0.920207	-0.19883	0.12946	0.124581			cap1*block2	0.281109	0.291359	0.334652	-0.09618	0.125837	0.444678			cap1*block2	0.163128	0.304682	0.59238	-0.37202	0.12504	0.00292873
		cap1*block3	0.112743	0.254401	0.657654	-0.31968	0.132876	0.0161363			cap1*block3	0.265286	0.288191	0.357317	0.073709	0.123475	0.550538			cap1*block3	0.277125	0.320738	0.387593	-0.07948	0.121054	0.51146
		cap1*block4	0.096489	0.303472	0.75053	-0.22544	0.129696	0.0821745			cap1*block4	-0.24537	0.287021	0.39263	0.29402	0.125821	0.0194512			cap1*block4	0.250387	0.318737	0.43214	-0.04264	0.124254	0.731472
		moment1*block2	0.411654	0.325306	0.205749	0.242971	0.249842	0.330805			moment1*block2	0.052545	0.471465	0.911261	0.695767	0.306645	0.0232724			moment1*block2	-0.20294	0.489561	0.67849	-0.90173	0.346742	0.00930827
		moment1*block3	0.319799	0.3314	0.334575	-0.06244	0.24408	0.798092			moment1*block3	0.414379	0.552268	0.453074	0.721314	0.353758	0.0414525			moment1*block3	0.082905	0.524879	0.874498	0.656398	0.32482	0.043303
		moment1*block4	0.428833	0.346443	0.215818	-0.58013	0.258426	0.0247791			moment1*block4	0.297054	0.486499	0.541478	0.492573	0.315696	0.118698			moment1*block4	-0.31745	0.541921	0.55803	-0.82624	0.35762	0.0208692
	Model:									Model:									Model:
	Number of individuals		475			6277				Number of individuals		738			5510				Number of individuals		662			4702
	Number of observations		8550			112986				Number of observations		13284			99180				Number of observations		11916			84636
	Log-likelihood		-2072.6			-22724.4				Log-likelihood		-3168.18			-20441.6				Log-likelihood		-2161.1			-17609.1
	Labels: type1 (copayments), type2 (coinsurances), rate1 (€2/40%), rate2 (€4/50%), rate3 (€7/70%), cap1 (half cap), cap2 (full cap). The block number is enclosed in variable label (e.g. block4 indicates block number 4) and is compared to reference dummy (block number 1). Respondents' characteristics are dummy coded. Hence, the utility derived from the reference dummy variable is equal to zero. Mod…									Labels: type1 (copayments), type2 (coinsurances), rate1 (€40/15%), rate2 (€50/20%), rate3 (€80/30%), cap1 (half cap), cap2 (full cap). The block number is enclosed in variable label (e.g. block4 indicates block number 4) and is compared to reference dummy (block number 1). Respondents' characteristics are dummy coded. Hence, the utility derived from the reference dummy variable is equal to zero. …									Labels: type1 (copayments), type2 (coinsurances), rate1 (€100/5%), rate2 (€140/7%), rate3 (€200/10%), cap1 (half cap), cap2 (full cap). The block number is enclosed in variable label (e.g. block4 indicates block number 4) and is compared to reference dummy (block number 1). Respondents' characteristics are dummy coded. Hence, the utility derived from the reference dummy variable is equal to zero.…
Equation7:
	Vij=β1*Type1 + β2*Rate1 + β3*Rate2 + β4*Cap1 + β5*Cap1*Type1 + β6*Cap1*Rate1 + β7*Cap1*Rate2 + β8*Cap1*Moment1 + β9*Moment1 + β10*AlternativeSpecificConstant(optout)+ β11*Type1*Block2 + β12*Type1*Block3 + β13*Type1*Block4 + β14*Rate1*Block2 + β15*Rate1*Block3 + β16*Rate1*Block4 + β17*Rate2*Block2 + β18*Rate2*Block3 + β19*Rate2*Block4 + β20*Cap1*Block2 + β21*Cap1*Block3 + β22*Cap1*Block4 + β23*Mom…
Full output
Type:	Prescribed medication								Type:	Prescribed medication
Group:	Forgoing healthcare								Group:	Utilizing healthcare
Output									Output
	Mixed logit model									Mixed logit model
	Number of obs		8550		Individuals	475				Number of obs		112986		Individuals	6277
	Log-likelihood		-2072.6							Log-likelihood		-22724.4
	Numer of Halton draws		5000							Numer of Halton draws		5000
	choice		Coefficient	Standard error	Z-score	p-value	95% Confidence Interval			choice		Coefficient	Standard error	Z-score	p-value	95% Confidence Interval
mean	moment1		-0.06063	0.121219	-0.50017	0.616968	-0.298219	0.176959	mean	asc		-0.2927	0.053301	-5.49145	3.99501e-08	-0.39717	-0.18823
	asc		2.5357	0.130778	19.3893	5.38827e-82	2.27937	2.79202		cap1		0.07614	0.0487647	1.56137	0.118438	-0.0194389	0.171719
	cap1		-0.01432	0.125885	-0.113755	0.909435	-0.261054	0.232414		cap1*moment1		0.005931	0.0333317	0.177939	0.858771	-0.0593991	0.0712611
	cap1*moment1		0.075183	0.0735799	1.02179	0.30691	-0.0690336	0.2194		cap1*type1		-0.02708	0.0217256	-1.24646	0.212599	-0.0696621	0.0155021
	cap1*type1		-0.03049	0.0609344	-0.500374	0.616824	-0.149921	0.0889414		cap1*rate1		-0.06949	0.0315595	-2.20187	0.0276762	-0.131347	-0.00763344
	cap1*rate1		-0.10354	0.0828975	-1.24901	0.211695	-0.266019	0.0589392		cap1*rate2		-0.06784	0.046	-1.47478	0.140274	-0.158	0.02232
	cap1*rate2		0.023428	0.11319	0.206979	0.836031	-0.198425	0.245281		type1*block2		-0.42229	0.236419	-1.78619	0.0740708	-0.885671	0.0410915
	type1*block2		-0.25909	0.478348	-0.541635	0.588084	-1.19665	0.678472		type1*block3		0.448294	0.253967	1.76517	0.077538	-0.0494804	0.946068
	type1*block3		-0.13636	0.532415	-0.256116	0.797868	-1.17989	0.907174		type1*block4		0.139838	0.222969	0.627165	0.530553	-0.29718	0.576856
	type1*block4		0.149619	0.459473	0.325632	0.744711	-0.750947	1.05019		rate1*block2		-0.02188	0.170499	-0.128329	0.897889	-0.356059	0.312299
	rate1*block2		-0.02555	0.395538	-0.0645956	0.948497	-0.800804	0.749704		rate1*block3		0.082537	0.246858	0.33435	0.738116	-0.401305	0.566379
	rate1*block3		0.254184	0.505746	0.502592	0.615264	-0.737078	1.24545		rate1*block4		0.44351	0.208701	2.1251	0.0335804	0.0344565	0.852563
	rate1*block4		-0.03613	0.452009	-0.0799321	0.936293	-0.922067	0.849807		rate2*block2		0.563501	0.145375	3.87618	0.000106169	0.278565	0.848437
	rate2*block2		0.42718	0.366115	1.16679	0.243327	-0.290405	1.14476		rate2*block3		0.001751	0.172537	0.0101486	0.991903	-0.336421	0.339923
	rate2*block3		-0.11837	0.403149	-0.293614	0.76906	-0.908542	0.671802		rate2*block4		0.909863	0.182209	4.99352	5.93761e-07	0.552734	1.26699
	rate2*block4		0.207097	0.402446	0.514595	0.606849	-0.581698	0.995892		cap1*block2		-0.19883	0.12946	-1.53584	0.124581	-0.452572	0.0549124
	cap1*block2		-0.03116	0.311053	-0.100176	0.920207	-0.640824	0.578504		cap1*block3		-0.31968	0.132876	-2.40585	0.0161363	-0.580117	-0.0592433
	cap1*block3		0.112743	0.254401	0.44317	0.657654	-0.385883	0.611369		cap1*block4		-0.22544	0.129696	-1.73822	0.0821745	-0.479644	0.0287638
	cap1*block4		0.096489	0.303472	0.317951	0.75053	-0.498315	0.691293		moment1*block2		0.242971	0.249842	0.972499	0.330805	-0.246719	0.732661
	moment1*block2		0.411654	0.325306	1.26544	0.205749	-0.225946	1.04925		moment1*block3		-0.06244	0.24408	-0.255818	0.798092	-0.540837	0.415957
	moment1*block3		0.319799	0.3314	0.964994	0.334575	-0.329745	0.969343		moment1*block4		-0.58013	0.258426	-2.24486	0.0247791	-1.08664	-0.073615
	moment1*block4		0.428833	0.346443	1.23782	0.215818	-0.250196	1.10786		type1		1.74091	0.0998299	17.4387	5.14991e-68	1.54524	1.93657
	type1		1.24352	0.200958	6.18798	6.37409e-10	0.849646	1.6374		rate1		0.813211	0.0814371	9.98576	1.79944e-23	0.653594	0.972828
	rate1		0.69533	0.190798	3.64432	0.00026969	0.321365	1.06929		rate2		0.276872	0.0583181	4.74762	2.06079e-06	0.162569	0.391175
	rate2		0.191917	0.170364	1.12651	0.259982	-0.141997	0.525831		moment1		1.62446	0.101425	16.0164	1.13626e-57	1.42567	1.82326
sd	type1		1.68305	0.0955196	17.6199	2.76501e-68	1.49583	1.87027	sd	type1		2.86954	0.0791581	36.2508	4.30489e-286	2.71439	3.02469
	rate1		0.775901	0.109599	7.07944	1.56182e-12	0.561086	0.990716		rate1		-1.04578	0.0441588	-23.6823	1.10218e-123	-1.13233	-0.959229
	rate2		0.002483	0.223862	0.0110917	0.991151	-0.436286	0.441252		rate2		-0.76579	0.0422847	-18.1103	3.35591e-73	-0.848668	-0.682912
										moment1		3.66757	0.0986154	37.1906	6.48252e-301	3.47428	3.86086
Type:	Diagnostic tests								Type:	Diagnostic tests
Group:	Forgoing healthcare								Group:	Utilizing healthcare
Output									Output
	Mixed logit model									Mixed logit model
	Number of obs		13284		Individuals	738				Number of obs		99180		Individuals	5510
	Log-likelihood		-3168.18							Log-likelihood		-20441.6
	Numer of Halton draws		5000							Numer of Halton draws		5000
	choice		Coefficient	Standard error	Z-score	p-value	95% Confidence Interval			choice		Coefficient	Standard error	Z-score	p-value	95% Confidence Interval
mean	asc		3.65234	0.174422	20.9397	8.16304e-96	3.31048	3.99421	mean	asc		0.76355	0.0562583	13.5722	6.38076e-42	0.653284	0.873816
	cap1		-0.04443	0.102548	-0.433262	0.664831	-0.245423	0.156563		cap1		-0.0384	0.0462925	-0.829507	0.406819	-0.129133	0.0523334
	cap1*moment1		-0.03856	0.0789113	-0.48865	0.625098	-0.193226	0.116106		cap1*moment1		-0.07469	0.0331964	-2.24994	0.0244547	-0.139755	-0.00962508
	cap1*type1		-0.00995	0.0633246	-0.157127	0.875147	-0.134066	0.114166		cap1*type1		-0.04333	0.0237276	-1.82614	0.0678319	-0.0898361	0.00317614
	cap1*rate1		0.012838	0.0906311	0.141651	0.887358	-0.164799	0.190475		cap1*rate1		-0.07588	0.0346843	-2.18773	0.0286913	-0.143861	-0.00789879
	cap1*rate2		-0.09508	0.117358	-0.810168	0.417858	-0.325103	0.134943		cap1*rate2		0.014019	0.0450333	0.311303	0.755571	-0.0742463	0.102284
	type1*block2		0.461789	0.595561	0.775385	0.438126	-0.705511	1.62909		type1*block2		-0.75536	0.280275	-2.69507	0.0070386	-1.3047	-0.206021
	type1*block3		-0.01131	0.546976	-0.0206773	0.983503	-1.08338	1.06076		type1*block3		-1.24626	0.280189	-4.44792	8.67988e-06	-1.79543	-0.697089
	type1*block4		-0.16021	0.541612	-0.295802	0.767386	-1.22177	0.90135		type1*block4		-0.51074	0.268313	-1.90352	0.0569754	-1.03663	0.015154
	rate1*block2		-0.96654	0.456322	-2.11811	0.0341844	-1.86093	-0.0721484		rate1*block2		1.07632	0.179204	6.00612	1.90677e-09	0.72508	1.42756
	rate1*block3		-1.07299	0.458926	-2.33805	0.0193996	-1.97248	-0.173495		rate1*block3		0.095762	0.196013	0.48855	0.625162	-0.288423	0.479947
	rate1*block4		0.646205	0.491352	1.31516	0.18848	-0.316845	1.60926		rate1*block4		0.956518	0.212207	4.50747	6.56811e-06	0.540591	1.37244
	rate2*block2		-1.13379	0.438737	-2.58421	0.00977068	-1.99371	-0.273866		rate2*block2		0.154558	0.164767	0.938043	0.348225	-0.168384	0.4775
	rate2*block3		-0.93219	0.483992	-1.92605	0.05412	-1.88081	0.0164338		rate2*block3		0.204665	0.212002	0.96539	0.334352	-0.21086	0.62019
	rate2*block4		-0.15899	0.451604	-0.352056	0.724802	-1.04413	0.726153		rate2*block4		0.29359	0.193959	1.51367	0.130112	-0.0865692	0.673749
	cap1*block2		0.281109	0.291359	0.96482	0.334652	-0.289954	0.852172		cap1*block2		-0.09618	0.125837	-0.764321	0.444678	-0.342821	0.150461
	cap1*block3		0.265286	0.288191	0.920522	0.357317	-0.299568	0.83014		cap1*block3		0.073709	0.123475	0.596956	0.550538	-0.168301	0.315719
	cap1*block4		-0.24537	0.287021	-0.854885	0.39263	-0.807931	0.317191		cap1*block4		0.29402	0.125821	2.33681	0.0194512	0.0474102	0.54063
	moment1*block2		0.052545	0.471465	0.111451	0.911261	-0.871526	0.976616		moment1*block2		0.695767	0.306645	2.26897	0.0232724	0.0947433	1.29679
	moment1*block3		0.414379	0.552268	0.750322	0.453074	-0.668066	1.49682		moment1*block3		0.721314	0.353758	2.039	0.0414525	0.0279476	1.41468
	moment1*block4		0.297054	0.486499	0.610596	0.541478	-0.656483	1.25059		moment1*block4		0.492573	0.315696	1.56028	0.118698	-0.126191	1.11134
	type1		0.617472	0.207536	2.97526	0.00293268	0.210702	1.02424		type1		1.04218	0.108743	9.58393	9.54677e-22	0.829048	1.25532
	rate1		1.14037	0.178628	6.38406	1.78186e-10	0.790262	1.49048		rate1		0.300425	0.0713583	4.21009	2.55488e-05	0.160563	0.440287
	rate2		0.784334	0.178039	4.4054	1.06417e-05	0.435377	1.13329		rate2		0.506204	0.0721942	7.0117	2.36935e-12	0.364703	0.647705
	moment1		0.338175	0.182412	1.85391	0.063774	-0.0193518	0.695702		moment1		3.17973	0.151694	20.9615	2.39866e-97	2.88241	3.47705
sd	type1		2.72518	0.143238	19.0256	1.19624e-79	2.44443	3.00592	sd	type1		3.22062	0.090923	35.4214	4.12004e-273	3.04241	3.39883
	rate1		-1.42628	0.126155	-11.3058	1.67513e-29	-1.67354	-1.17902		rate1		-0.85128	0.0474236	-17.9505	6.18004e-72	-0.94423	-0.75833
	rate2		1.39553	0.12936	10.788	5.07839e-27	1.14198	1.64907		rate2		0.838364	0.0465725	18.0013	2.48416e-72	0.747082	0.929646
	moment1		1.91796	0.112805	17.0024	3.75383e-64	1.69686	2.13906		moment1		4.68437	0.130069	36.0144	3.3529e-282	4.42943	4.9393
Type:	Specialist care								Type:	Specialist care
Group:	Forgoing healthcare								Group:	Utilizing healthcare
Output									Output
	Mixed logit model									Mixed logit model
	Number of obs		11916		Individuals	662				Number of obs		84636		Individuals	4702
	Log-likelihood		-2161.1							Log-likelihood		-17609.1
	Numer of Halton draws		5000							Numer of Halton draws		5000
	choice		Coefficient	Standard error	Z-score	p-value	95% Confidence Interval			choice		Coefficient	Standard error	Z-score	p-value	95% Confidence Interval
mean	asc		4.13966	0.184624	22.4221	4.25461e-109	3.77779	4.50152	mean	asc		1.14834	0.0571314	20.0999	1.19768e-89	1.03636	1.26032
	cap1		-0.06481	0.113128	-0.57289	0.56673	-0.286541	0.156921		cap1		0.033319	0.0446654	0.745969	0.455688	-0.0542252	0.120863
	cap1*moment1		0.059244	0.0954673	0.620569	0.534895	-0.127872	0.24636		cap1*moment1		-0.05073	0.0350286	-1.44825	0.147552	-0.119386	0.017926
	cap1*type1		-0.05259	0.0761446	-0.69066	0.489793	-0.201833	0.0966534		cap1*type1		0.084065	0.0253969	3.31006	0.000933162	0.0342872	0.133843
	cap1*rate1		0.099392	0.102951	0.965426	0.334351	-0.102393	0.301177		cap1*rate1		-0.08666	0.0356791	-2.42887	0.015148	-0.156591	-0.0167289
	cap1*rate2		-0.00891	0.130342	-0.0683587	0.945501	-0.26438	0.24656		cap1*rate2		0.02734	0.0460435	0.593787	0.552656	-0.0629052	0.117585
	type1*block2		0.672092	0.614979	1.09287	0.274473	-0.533267	1.87745		type1*block2		0.979863	0.322003	3.04302	0.00234286	0.348737	1.61099
	type1*block3		-0.70198	0.661002	-1.06199	0.28826	-1.99754	0.593584		type1*block3		-0.48963	0.315006	-1.55435	0.120105	-1.10704	0.127782
	type1*block4		0.227852	0.589267	0.38667	0.699007	-0.927112	1.38282		type1*block4		1.26463	0.310916	4.06744	4.75753e-05	0.655238	1.87403
	rate1*block2		-0.31436	0.475181	-0.661558	0.508267	-1.24571	0.616995		rate1*block2		0.006551	0.186773	0.0350747	0.97202	-0.359523	0.372625
	rate1*block3		-0.63856	0.689572	-0.926023	0.354453	-1.99012	0.713002		rate1*block3		-0.23376	0.24893	-0.93906	0.347702	-0.721662	0.254142
	rate1*block4		-0.78399	0.532402	-1.47255	0.140898	-1.8275	0.259518		rate1*block4		-0.12867	0.220161	-0.584435	0.558929	-0.560186	0.302846
	rate2*block2		-0.19234	0.390646	-0.492364	0.622471	-0.958005	0.573325		rate2*block2		0.169438	0.154894	1.0939	0.274002	-0.134153	0.473029
	rate2*block3		-0.44886	0.458301	-0.9794	0.327402	-1.34713	0.44941		rate2*block3		0.305622	0.176513	1.73144	0.0833774	-0.0403444	0.651588
	rate2*block4		-0.8996	0.484256	-1.85769	0.063237	-1.84874	0.049542		rate2*block4		0.289204	0.190526	1.51793	0.129036	-0.0842262	0.662634
	cap1*block2		0.163128	0.304682	0.535404	0.59238	-0.434048	0.760304		cap1*block2		-0.37202	0.12504	-2.97521	0.00292873	-0.617098	-0.126942
	cap1*block3		0.277125	0.320738	0.864022	0.387593	-0.351522	0.905772		cap1*block3		-0.07948	0.121054	-0.656568	0.51146	-0.316745	0.157785
	cap1*block4		0.250387	0.318737	0.785561	0.43214	-0.374337	0.875111		cap1*block4		-0.04264	0.124254	-0.343169	0.731472	-0.286177	0.200897
	moment1*block2		-0.20294	0.489561	-0.414535	0.67849	-1.16248	0.7566		moment1*block2		-0.90173	0.346742	-2.60058	0.00930827	-1.58134	-0.222116
	moment1*block3		0.082905	0.524879	0.157951	0.874498	-0.945858	1.11167		moment1*block3		0.656398	0.32482	2.02081	0.043303	0.0197509	1.29305
	moment1*block4		-0.31745	0.541921	-0.585787	0.55803	-1.37961	0.744714		moment1*block4		-0.82624	0.35762	-2.31039	0.0208692	-1.52718	-0.125305
	type1		-0.97422	0.227579	-4.28081	1.87673e-05	-1.42027	-0.528166		type1		-0.80092	0.117898	-6.79331	1.10307e-11	-1.032	-0.569839
	rate1		0.780626	0.229249	3.40515	0.000663463	0.331298	1.22995		rate1		0.659102	0.086	7.66398	1.82171e-14	0.490542	0.827662
	rate2		0.254226	0.163423	1.55563	0.119822	-0.0660826	0.574535		rate2		0.09062	0.0609918	1.48577	0.137343	-0.0289239	0.210164
	moment1		0.650153	0.177353	3.66587	0.000247566	0.302542	0.997764		moment1		4.19244	0.164024	25.5599	1.50032e-143	3.87096	4.51393
sd	type1		2.50311	0.126917	19.7224	3.14866e-85	2.25435	2.75187	sd	type1		3.25853	0.0943504	34.5364	1.47532e-259	3.0736	3.44345
	rate1		-1.00881	0.135063	-7.46918	8.63215e-14	-1.27353	-0.744087		rate1		-0.87943	0.0508626	-17.2903	7.25347e-67	-0.979121	-0.779739
	rate2		0.040182	0.219381	0.183161	0.854675	-0.389805	0.470169		rate2		0.39079	0.0761709	5.13044	2.89703e-07	0.241495	0.540085
	moment1		1.81749	0.0997898	18.2132	3.96998e-73	1.6219	2.01307		moment1		4.97239	0.141538	35.1312	1.95659e-268	4.69498	5.24981
